# Box C/D Small Nucleolar Ribonucleoproteins

## Regulate Mitochondrial Surveillance and Innate Immunity

Short Title: **snoRNPs act as a molecular switch**

Elissa Tjahjono, Alexey V. Revtovich, Natalia V. Kirienko\*

Department of BioSciences, 6100 Main St, MS140, Rice University, Houston TX 77005 USA

\*Address correspondence to Natalia V. Kirienko, kirienko@rice.edu

### **Abstract**

Monitoring of mitochondrial functions is crucial for organismal survival. This task is performed by mitochondrial surveillance or quality control pathways, which are activated by signals originating from mitochondria and relayed to the nucleus (retrograde response) to start the transcription of protective genes. In *Caenorhabditis elegans*, several systems exist, including the UPR<sup>mt</sup>, MAPK<sup>mt</sup>, and the ESRE pathway. These pathways are highly conserved and their loss results in compromised survival following mitochondrial stress.

In this study, we found a novel interaction between the box C/D snoRNA core proteins (snoRNPs) and mitochondrial surveillance and innate immunity pathways. We showed that C/D snoRNPs are required for the full expressions of UPR<sup>mt</sup> and ESRE upon stress. Meanwhile, we found that the loss of C/D snoRNPs increased immune responses. Understanding the “molecular switch” mechanisms of interplay between these pathways may be important for understanding of multifactorial processes,

22 including response to infection or aging.

23 **Keywords:** *mitochondria, snoRNPs, surveillance, translation inhibition, infection response*

24

## 25 **Introduction**

26 All living organisms require the maintenance of cellular homeostasis very different than their  
27 surroundings. Maintaining these conditions requires constant surveillance for disruption and metabolic  
28 adjustments to reacquire the proper biochemical balance. Meanwhile, a variety of insults can disrupt  
29 this balance, ranging from environmental changes to pathogen infection to metabolic dysfunction.  
30 Indeed, almost all cellular pathways are disrupted in one infection or another, including protein  
31 translation (1, 2), the proteostatic machinery (3-5), the cytoskeleton (6), the endoplasmic reticulum (7,  
32 8) and others (9, 10).

33 Given the central role of the mitochondria in energy production, biosynthesis of heme groups, lipid  
34 metabolism, the regulation of iron and calcium homeostasis, and production of reactive oxygen species  
35 (ROS), it should be no surprise that mitochondria are also impacted by disease and infection (11-13).  
36 Therefore, mitochondria are subjected to several important surveillance pathways. The two best known  
37 are the PINK1/Parkin axis for macroautophagic mitochondrial recycling (commonly known as mitophagy)  
38 and the unfolded protein response in mitochondria (UPR<sup>mt</sup>) (14-17). Both systems monitor the  
39 functionality of mitochondrial protein import. Failure to import PINK1 activates its kinase function,  
40 resulting in subsequent recruitment of autophagic machinery. Under the same compromised  
41 mitochondrial import conditions, rerouting of the key transcription factor ATFS-1/ATF5 to the nucleus  
42 activates the expression of chaperones and other stress mediators.

43 A third, rather more elusive, mitochondrial pathway that has been published utilizes the DLK-1/SEK-  
44 3/PMK-3 MAP kinase cascade (which we will refer to as the MAPK<sup>mt</sup> pathway) was identified by

45 activating mitochondrial stress and searching for differentially expressed genes that were independent  
46 of ATFS-1/ATF5 regulation (18). Regulation of this pathway appears to involve a C/EBP family  
47 transcription factor and senses disruption of the mitochondrial electron transport chain (ETC). It is  
48 involved in the extended lifespan observed in long-lived mitochondrial (Mit) mutants (18). Interestingly,  
49 fluvastatin, which disrupts mevalonate metabolism and prevents geranylgeranylation of certain  
50 components of the vesicular trafficking system, also activates the MAPK<sup>mt</sup> pathway, indicating that  
51 surveillance of mitochondrial cholesterol metabolism is also important (19).

52 Our lab has previously identified a key mitochondrial surveillance program in *C. elegans* regulated by  
53 cellular ROS (20, 21). This pathway, known as the Ethanol and Stress Response (ESRE) network, is named  
54 after an 11-nucleotide motif found in the promoter region of hundreds of genes in *C. elegans* and  
55 ethanol-responsive genes in mice, and is activated by a range of abiotic triggers (22-24). Interestingly,  
56 exposure to the opportunistic human pathogen, *Pseudomonas aeruginosa*, which produces a xenobiotic  
57 siderophore called pyoverdine that hijacks mitochondria-resident iron from *C. elegans*, also activates the  
58 ESRE network (20, 25, 26). Active study from our lab and others has linked several determinants to ESRE  
59 gene expression, including the JumonjiC-domain containing protein JMJC-1/Riox1 (also known as NO66)  
60 (22), the PBAF nucleosome remodeling complex (27), and a family of bZIP transcription factors (ZIP-2,  
61 ZIP-4, CEBP-1, and CEBP-2) (20), and a Zn-finger transcription factor SLR-2 (22, 28). Importantly, the ESRE  
62 motif, the genes regulated by it, and their activation in response to stress are ancient and evolutionarily  
63 conserved from *C. elegans* to humans (22, 24) and appears to be the first known pathway to respond to  
64 intracellular reductive stress (21).

65 Mitochondrial surveillance programs not only activate programs to reacquire homeostasis, they also  
66 activate innate immune functions, a process sometimes termed surveillance immunity (29). However,  
67 innate immune activation is energetically costly and requires considerable energy conversion (30, 31)

68 and excess immune activity is associated with a broad range of deleterious health outcomes. Thus, it  
69 behooves the organism to carefully balance the need to reacquire homeostasis and repair damage with  
70 stimulating innate immune functions that can cause further damage. How organisms navigate this  
71 choice remains a poorly understood area of biology.

72 Small nucleolar ribonucleoproteins (snoRNPs) are small complexes that catalyze modifications to  
73 RNA in cells. Generally speaking, there are two major groups of snoRNPs, called the box C/D and box  
74 H/ACA families, categorized based on their functions and the secondary structures of their snoRNA  
75 components (32). The core members of box C/D snoRNPs, consisting of FIB-1/Fibrillarin (the catalytic  
76 methyltransferase), NOL-56/Nop56, NOL-58/Nop58, and M28.5/SNU13 (**Figure 1A**), assist in site-specific  
77 2'-O-methylation while box H/ACA family, consisting of Y66H1A.4/Gar1, Y48A6B.3/Nhp2, NOLA-  
78 3/Nop10, and K01G5.5/dyskerin, is involved in pseudouridylation (**Figure 1B**) (33). Both families target  
79 mostly ribosomal RNA, with the modifications typically clustered at biologically important locations (34).  
80 The snoRNA has sequence complementarity to the modification target site and serves as an aid to  
81 localize the enzymatic function of the snoRNP complex (34). snoRNP complexes had been suggested to  
82 have functional roles well beyond the processing of rRNA, including 2'-O-methylation, splicing, and  
83 translation of mRNAs (35-39).

84 In this study, we identified a non-canonical role for box C/D snoRNPs where they appear to serve as  
85 a molecular switch that activates mitochondrial surveillance and represses conventional innate immune  
86 processes. For example, box C/D snoRNPs upregulate ESRE and UPR<sup>mt</sup> while downregulating the function  
87 of the PMK-1/p38 MAPK pathway. Contrarily, knockdown of box C/D snoRNPs upregulated MAPK<sup>mt</sup>  
88 pathway effectors, but this was likely a secondary effect from the loss of MAPK<sup>mt</sup> repression by the  
89 UPR<sup>mt</sup>, which is characteristic of the complicated interactions between these surveillance systems. Since  
90 box C/D snoRNPs and these mitochondrial surveillance systems are all conserved between *C. elegans*

91 and humans, our results may lead to a better understanding of processes affecting mitochondrial health

92 and innate immune pathways in human diseases.

Figure 1.

### A Box C/D snoRNA-snoRNP complex

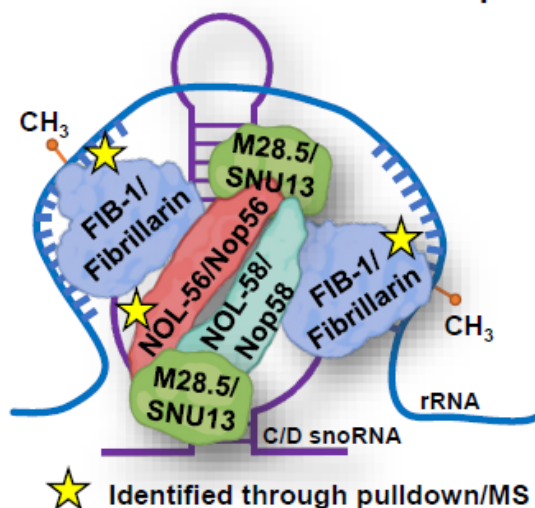

### B Box H/ACA snoRNA-snoRNP complex

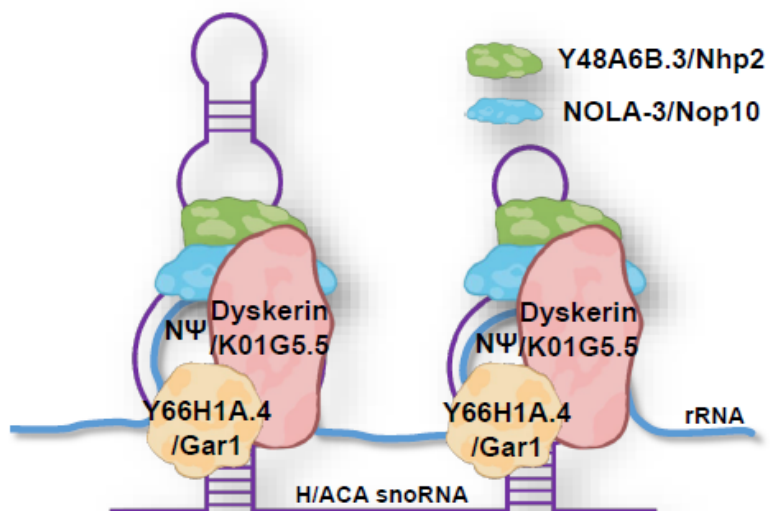

Cartoon representation of snoRNA and snoRNP complexes.

(A) Box C/D snoRNA and C/D snoRNP core protein members, stars indicated proteins identified through oligo pulldown-mass spectrometry experiment. (B) Box H/ACA snoRNA and H/ACA snoRNP core protein members.

93

## 94 **Results**

### 95 *Identification of FIB-1/Fibrillarlin and NOL-56/Nop56 as regulators of the ESRE pathway*

96 To identify additional regulatory components of the ESRE pathway, we used a biochemical pulldown  
97 method (**Figure 2, Figure 2-source data 1-4**). A 5' biotinylated oligonucleotide comprised of a 3x or 4x  
98 tandem repeat of the consensus 11-nucleotide motif was used as bait. Young adult *C. elegans* were  
99 exposed to either DMSO, 1 mM phenanthroline (a chemical iron chelator), or 50  $\mu$ M rotenone (inhibitor  
100 of electron transport chain Complex I) to trigger mitochondrial damage and ESRE gene activation (20).  
101 Proteins were extracted from the cytoplasm and nuclei and mixed with the biotinylated ESRE bait and  
102 then pulled down using streptavidin-coated magnetic beads. Electrophoretic mobility shift assay (EMSA)  
103 (27) was used to optimize enrichment of ESRE-binding proteins and to verify specificity (**Figure 2B**).

104 We detected multiple bands when EMSA was performed with three tandem ESRE sequences  
105 (3XESRE) as a bait (**Figure 2B, Figure 2-source data 1-2**). These bands might indicate constitutive binding  
106 of the ESRE motif, different activated form of the transcription factor (40), or mere non-specific  
107 bindings. To increase specificity, we added an additional ESRE sequence into the DNA probe (4XESRE).  
108 We observed a decrease of unspecific bindings, with one of the bands (Shift) to remain. This DNA  
109 binding activity was enhanced by both phenanthroline and rotenone exposure (**Figure 2B, Figure 2-**  
110 **source data 3-4**). This result confirmed that a stress-inducible nuclear factor(s) binds the ESRE motif  
111 after mitochondrial damage and suggested that it may be required for the transcription of the ESRE  
112 genes. Using the same conditions, bound materials were eluted and subjected to tandem MS/MS  
113 analysis for identification of potential peptide fragments.

114 The gene products identified by mass spectrometry were categorized by using the 'SRA' binning  
115 system and the 'iBAQ' score. The 'SRA' or 'Strict, Relaxed, and All' binning approach utilizes tiered  
116 metrics to score gene identification quality, in which the identified 'Strict' genes products pass a 1% FDR

117 cutoff (41). Meanwhile, the ‘iBAQ’ scores were calculated based on peptide peak intensities and number  
118 of potential peptides, comparable to the absolute protein quantity. We searched for proteins that  
119 passed the ‘SRA’ binning system as ‘Strict’ and are enriched in rotenone-treated samples, as compared  
120 to DMSO control, yielding 75 candidates.

121 To establish a role in ESRE function, each gene predicted to encode one of these proteins was  
122 knocked down via RNAi in a strain of *C. elegans* carrying a 3x tandem repeat of the ESRE consensus  
123 sequence driving a GFP reporter (3xESRE::GFP) (21). Activation of the reporter was induced using 50  $\mu$ M  
124 rotenone. Amongst the candidate genes, only RNAi targeting *fib-1/Fibrillarlin* and *nol-56/Nop56* reduced  
125 reporter expression (**Figure 3**). After identifying a role for FIB-1 and NOL-56, we also tested *nol-*  
126 *58/Nop58(RNAi)*, which is a third member of the box C/D snoRNP complex (**Figure 1A**) but was not  
127 identified in the affinity-purified material. *nol-58/Nop58(RNAi)* also reduced ESRE expression (**Figure 3**).  
128 Current understanding is that the assembly of box C/D snoRNPs occurs via FIB-1/Fibrillarlin and NOL-  
129 58/Nop58 independently binding the snoRNA and then NOL-56/Nop56 associates with the complex but  
130 does not bind to the snoRNA alone (42). Since knockdown of any of the genes for these three proteins  
131 reduces ESRE signaling, it seems likely that the snoRNP complex as a whole is binding to ESRE.

132 Although worms reared on RNAi targeting *fib-1/FBL*, *nol-56/Nop56*, or *nol-58/Nop58* exhibited  
133 reductions in ESRE signaling, they also showed clear signs of reduced growth and development, resulting  
134 in smaller adults, which is consistent with a previous report (43). To avoid this effect, we performed the  
135 same experiment, but exposed worms to RNAi starting at the L3 stage instead. Exposure at a later stage  
136 of development can circumvent some of the developmental effects, but it can also reduce penetrance  
137 (44). However, knockdowns at L3 also reduced ESRE activation upon stress (**Figure 3B, D**). These data  
138 confirm that box C/D snoRNPs are required for ESRE pathway gene regulation.

Figure 2.

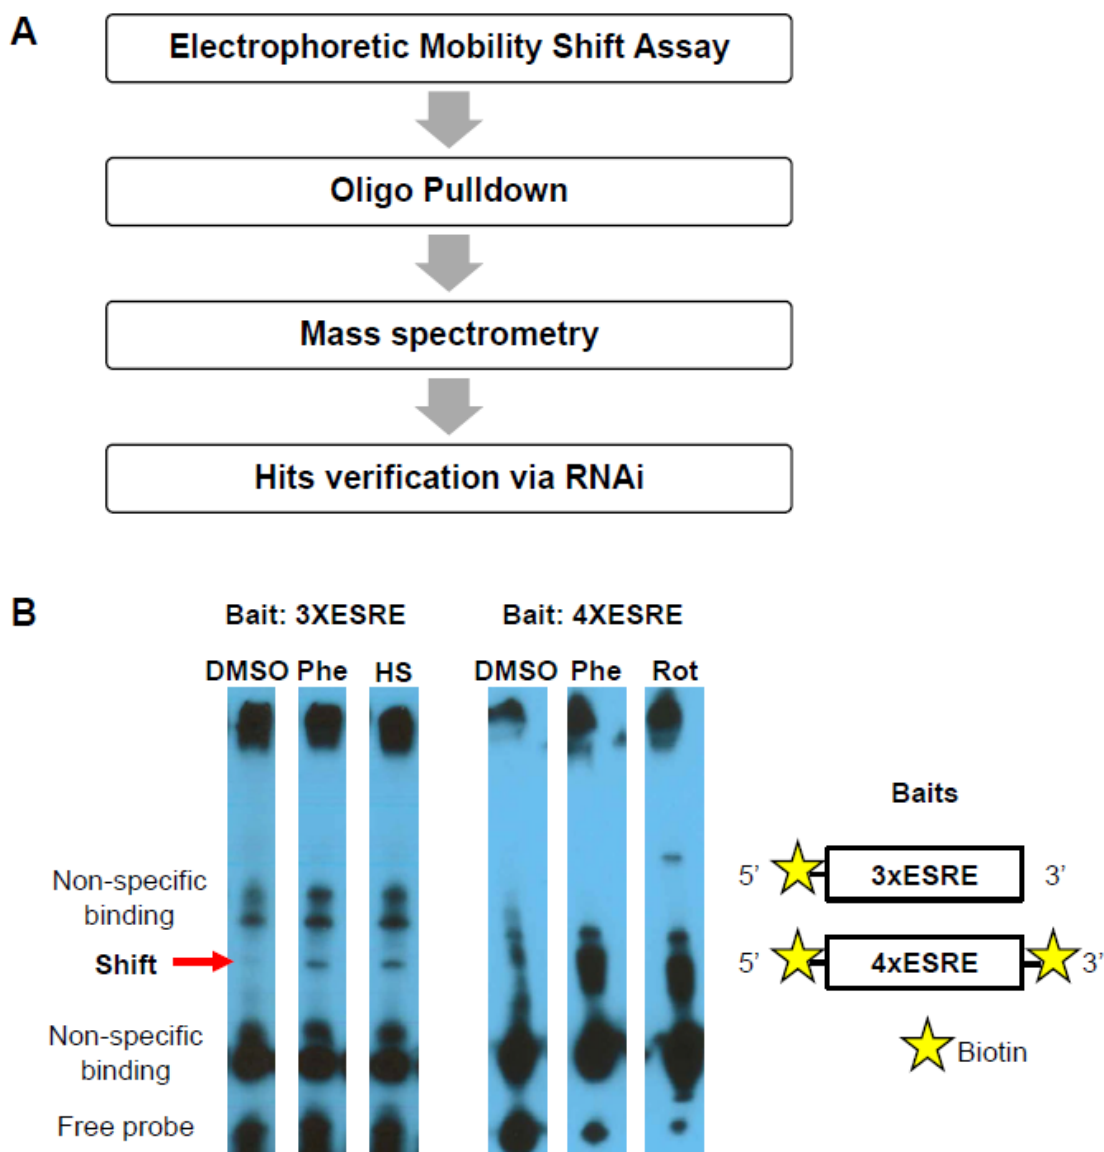

**Proteomic assays revealed the presence of ESRE-binding factor(s).**

(A) Schematic of planned biochemical assays to identify ESRE regulators. (B) Electrophoretic mobility shift assay (EMSA) showed the presence of the ESRE-binding motif through the identified 'Shift'.



Figure 3.

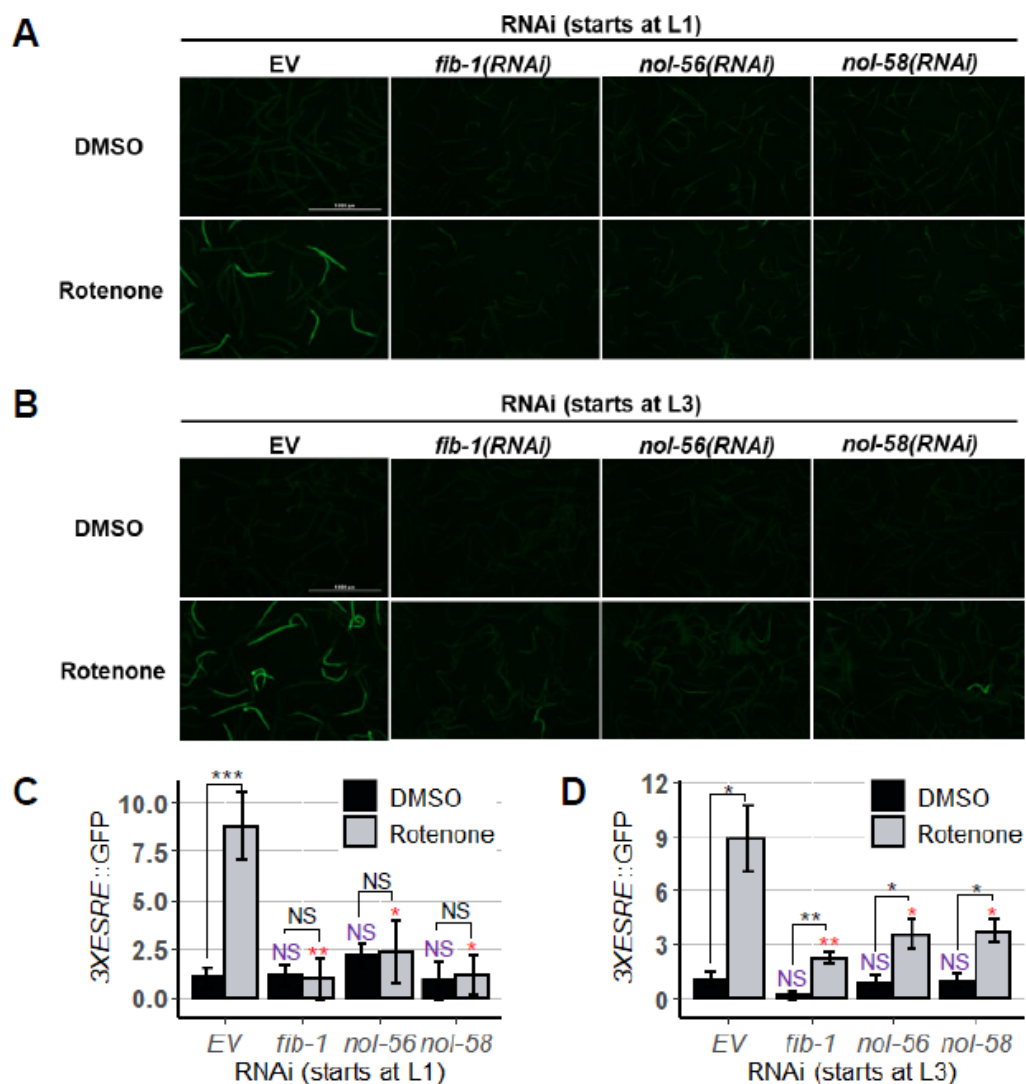

**RNAi targeting members of box C/D snoRNP reduced ESRE expression.**

(A, B) Fluorescent images and (C, D) quantification of GFP fluorescence of *C. elegans* carrying 3XESRE::GFP reporters that were reared on *E. coli* expressing empty vector (EV), *fib-1(RNAi)*, *nol-56(RNAi)*, or *nol-58(RNAi)*. Worms were treated for 8 h with vehicle (DMSO) (top) or 50  $\mu$ M rotenone (bottom). RNAi treatment was started at (A, C) L1 or (B, D) L3 stage. Representative images are shown; three biological replicates with ~400 worms/replicate were analyzed. Error bars represent SEM. *p* values were determined from one-way ANOVA, followed by Dunnett's test, and Student's *t*-test. All fold changes were normalized to DMSO-EV control. NS not significant, \**p* < 0.05, \*\* *p* < 0.01, \*\*\* *p* < 0.001.

140

141

142 *Box C/D snoRNPs also regulate UPR<sup>mt</sup> and MAPK<sup>mt</sup>*

143 To assess whether knocking down box C/D snoRNPs only affected the ESRE pathway or impacted  
144 other mitochondrial stress responses, we measured the expression of downstream effectors for UPR<sup>mt</sup>  
145 and MAPK<sup>mt</sup> using GFP-based reporters. Young adult worms carrying *Phsp-6::GFP* (for UPR<sup>mt</sup>) were  
146 reared on plates containing all pairwise mixtures of RNAi: empty vector or *spg-7/SPG7(RNAi)* with empty  
147 vector, *fib-1(RNAi)*, *nol-56(RNAi)* or *nol-58(RNAi)*. SPG-7/SPG7 is a mitochondria-resident protease that  
148 is required for normal organellar function (45); *spg-7(RNAi)* efficiently induces UPR<sup>mt</sup> (18, 46, 47). As with  
149 the ESRE pathway, knockdown of *fib-1*, *nol-56*, or *nol-58* reduced the ability of the UPR<sup>mt</sup> to respond to  
150 stress, regardless of whether RNAi was begun at the L1 or L3 stage (**Figure 4A, B**). Importantly, we also  
151 observed significant reduction of the basal level of reporter gene expression. Unlike induced ESRE  
152 function following L1 RNAi, however, neither condition completely disrupted UPR<sup>mt</sup> activity (compare  
153 **Figure 3** and **Figure 4A**).

154 Previously, we demonstrated relationships between the ESRE network and the UPR<sup>mt</sup> and MAPK<sup>mt</sup>  
155 pathways (21). For example, UPR<sup>mt</sup> and MAPK<sup>mt</sup> activity normally places a brake on the ESRE network by  
156 limiting the production of ROS that activate ESRE. We also identified an ESRE motif in the promoter  
157 region of *ATFS-1/ATF5* that was required for its full expression.

158 Using *spg-7(RNAi)* to induce UPR<sup>mt</sup>, we compared *Phsp-6::GFP* reporter expression in strains with or  
159 without the ESRE motif in *atfs-1* promoter on vector control or after disrupting the box C/D snoRNP  
160 complex. As expected, knocking down the protease induced GFP expression in each condition. Similar to  
161 our previous findings, basal and induced expression of *Phsp-6::GFP* was lower when ESRE motif was  
162 removed (blue significance marks in **Figures 4C-D**). Adding RNAi targeting the box C/D machinery to the  
163 ESRE deletion changed basal expression only when RNAi was initiated at L1 stage. Induction of *hsp-*  
164 *6::GFP* by *spg-7(RNAi)* was lower when compared to empty vector or when compared to induced  
165 conditions with an intact promoter and box C/D RNAi. These data indicate that the box C/D complex

166 regulates UPR<sup>mt</sup> both via modulation of ESRE pathway (due to a presence of ESRE motif, which is  
 167 required for full expression of *atfs-1*) and independently of ESRE.

Figure 4.

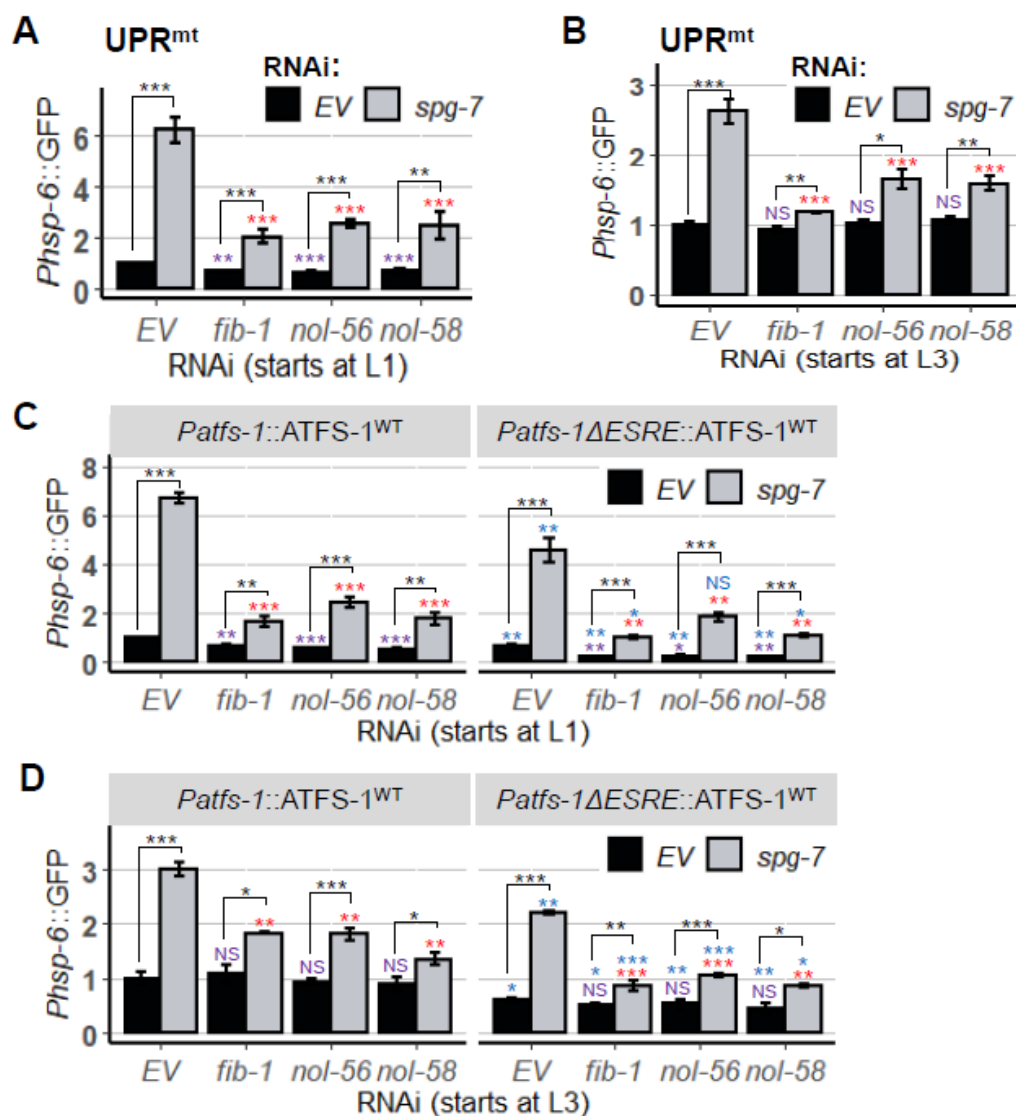

**Box C/D snoRNPs(RNAi) reduced UPR<sup>mt</sup> expression.**

Quantification of GFP fluorescence of *C. elegans* carrying *Phsp-6::GFP* reporter that were reared on *E. coli* expressing empty vector (EV) or RNAi targeting box C/D snoRNP members: *fib-1/FBL*, *nol-56/Nop56*, and *nol-58/Nop58*. RNAi was doubled with empty vector (EV) or *spg-7*(RNAi). In (C, D), *Phsp-6::GFP* reporter strains were wild type or crossed with *Patfs-1ΔESRE::ATFS-1*<sup>WT</sup>. Three biological replicates with ~400 worms/replicate were analyzed. Error bars represent SEM. *p* values were determined from one-way ANOVA, followed by Dunnett's test, and Student's *t*-test. All fold changes were normalized to EV control. NS not significant, \**p* < 0.05, \*\**p* < 0.01, \*\*\**p* < 0.001.

168

169 Contrary to what was observed for UPR<sup>mt</sup>, *fib-1(RNAi)*, *nol-56(RNAi)*, and *nol-58(RNAi)* caused a  
170 statistically significant increase in basal expression level of the *Ptbb-6::GFP* MAPK<sup>mt</sup> reporter (**Figure 5A**),  
171 indicating that the box C/D snoRNP complex is directly or indirectly involved in repressing basal  
172 expression of the MAPK<sup>mt</sup> pathway. This difference disappeared if RNAi targeting the box C/D snoRNP  
173 complex was initiated at the L3 stage (**Figure 5B**). RNAi at either stage had no effect on *Ptbb-6::GFP*  
174 expression after induction via *spg-7(RNAi)*. As expected, *Ptbb-6::GFP* expression was at least partially  
175 dependent upon PMK-3/MAPK14, both under wild-type and box C/D snoRNP conditions (**Figure 5C**).  
176 Previously we demonstrated that ATFS-1 plays a role in repressing *tbb-6* expression (21). Since we  
177 showed above that ATFS-1 activity can depend on box C/D snoRNPs, we tested whether *fib-1(RNAi)*, *nol-*  
178 *56(RNAi)*, or *nol-58(RNAi)* would affect ATFS-1-mediated repression *tbb-6*. In each case, *atfs-1*  
179 knockdown was indistinguishable from *atfs-1; snoRNPs* double RNAi. (**Figure 5D**). Combined, these data  
180 argue that the box C/D complex regulates basal expression of the MAPK<sup>mt</sup> stress response system via  
181 altering levels of ATFS-1. We also speculate that the absence of changes for basal ESRE reporter  
182 expression are due to consistent observations that ESRE network activation must be spurred by  
183 recognition of stress, while *Phsp-6::GFP* and *Ptbb-6::GFP* exhibit low levels of expression even in the  
184 absence of stress (18).

185 We further asked whether localization of these snoRNPs in the nucleolus is necessary for the  
186 regulation to take an effect. We knocked down *ruvb-1/RUVB*, an AAA+ ATPase that promotes box C/D  
187 snoRNPs assembly and localization to nucleoli (43). Worms reared on *ruvb-1(RNAi)*-expressing *E. coli* at  
188 L1 did not show growth arrest. *ruvb-1/RUVB* knockdown markedly reduced ESRE expression following  
189 stress (**Supplementary Figure 1A**). However, induced expression of UPR<sup>mt</sup> was not affected  
190 (**Supplementary Figure 1B**) and increased in basal expression of MAPK<sup>mt</sup> reporter was also more modest  
191 than what was observed for C/D snoRNPs knockdown (**Supplementary Figure 1C**). This suggests that

192 localization of box C/D snoRNPs may affect some but not all of the responses of mitochondrial  
 193 surveillance.

Figure 5.

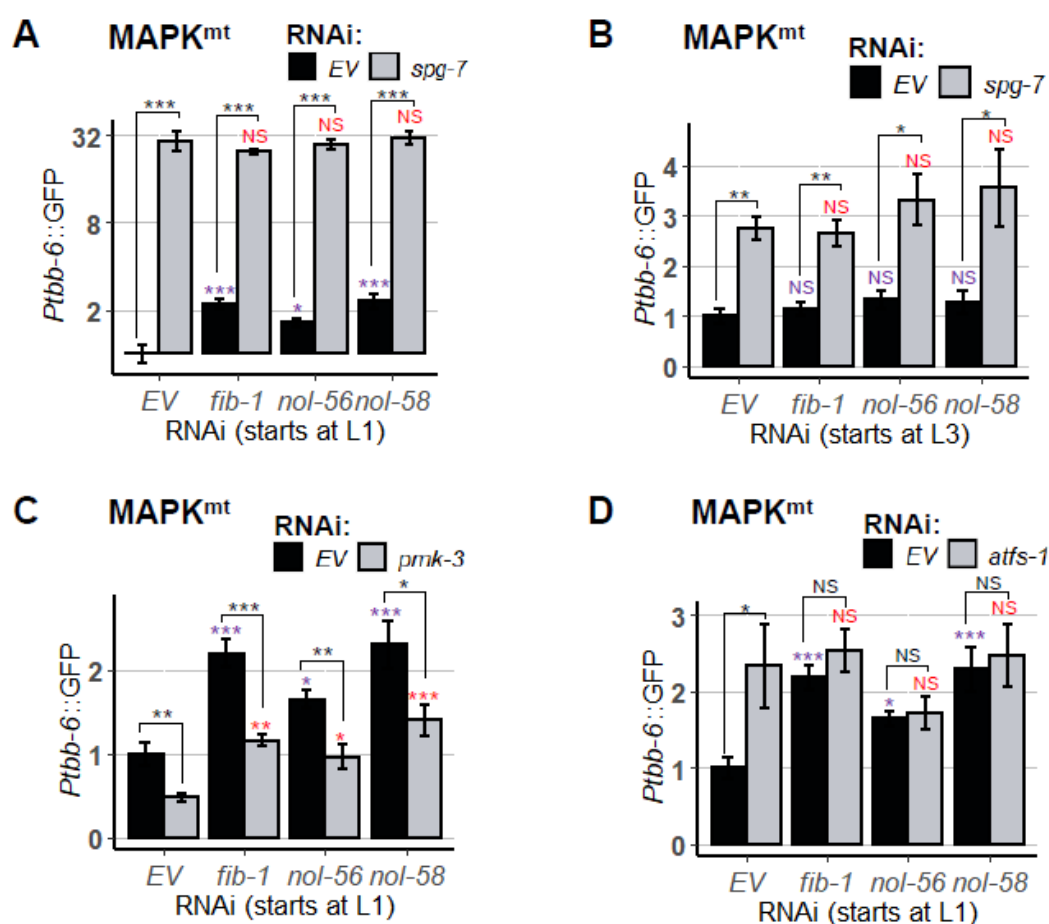

**The loss of box C/D snoRNPs increased MAPK<sup>mt</sup> expression.**

Quantification of GFP fluorescence of *C. elegans* carrying *Ptbb-6::GFP* reporter that were reared on *E. coli* expressing empty vector (EV) or RNAi targeting box C/D snoRNP members: *fib-1/FBL*, *nol-56/Nop56*, and *nol-58/Nop58*. RNAi was doubled with empty vector (EV) or (A-B) *spg-7*(RNAi), (C) *pmk-3*(RNAi), or (D) *atfs-1*(RNAi). Three biological replicates with ~400 worms/replicate were analyzed. Error bars represent SEM. *p* values were determined from one-way ANOVA, followed by Dunnett's test, and Student's *t*-test. All fold changes were normalized to EV control. NS not significant, \**p* < 0.05, \*\* *p* < 0.01, \*\*\* *p* < 0.001.

194

## Supplementary Figure 1.

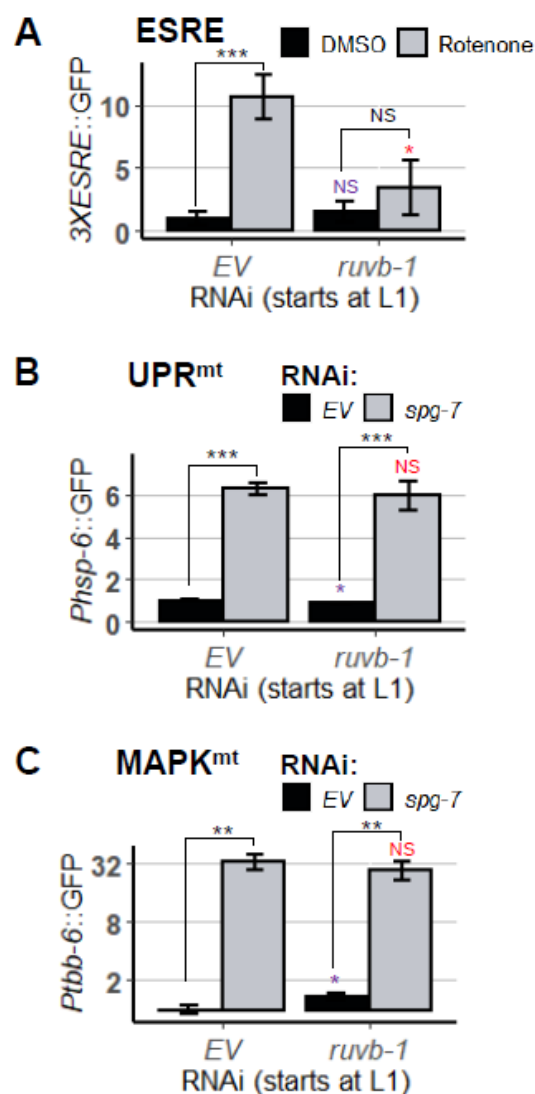

Knockdown of box C/D snoRNP assembly factor RUVB-1 slightly affected the mitochondrial surveillance pathways. Quantification of GFP fluorescence of *C. elegans* carrying (A) 3XESRE::GFP, (B) Phsp-6::GFP, and (C) Ptbb-6::GFP reporters that were reared on *E. coli* expressing RNAi targeting empty vector (EV) or *ruvb-1*/RUVB. In (A), worms were treated for 8 h with vehicle (DMSO) or 50  $\mu$ M rotenone. In (B, C), double RNAi was performed with empty vector (EV) or *spg-7*(RNAi). Three biological replicates with ~400 worms/replicate were analyzed. Error bars represent SEM. *p*-values were determined from Student's *t*-test. GFP values were normalized to EV-DMSO or EV. NS not significant, \**p* < 0.05, \*\**p* < 0.01, \*\*\**p* < 0.001.

195

196

197 *Disruption of box H/ACA snoRNP machinery does not affect mitochondrial surveillance pathways*

198 One possible explanation for the phenomena that we observed was that the reduction of 2'-O-  
199 methylation of rRNA compromised normal ribosomal function. If this were true, other broad-scale  
200 ribosomal changes should have similar outcomes. As previously noted, the conversion of dozens to  
201 hundreds of uridine residues to pseudouridine in rRNA is catalyzed by box H/ACA snoRNPs (48, 49). RNAi  
202 was used to target the genes encoding three of the four essential proteins for box H/ACA complex  
203 activity: *nola-3/Nop10*, *Y48A6B.3/Nhp2*, and *Y66H1A.4/Gar1*, and basal and induced expression of  
204 mitochondrial stress reporters were assessed. We observed no significant change of expression for any  
205 of the mitochondrial surveillance pathways tested in either basal or induced conditions (**Supplementary**  
206 **Figure 2**). This result indicates that the function of box C/D snoRNPs in regulating mitochondrial  
207 homeostasis is specific.

## Supplementary Figure 2.

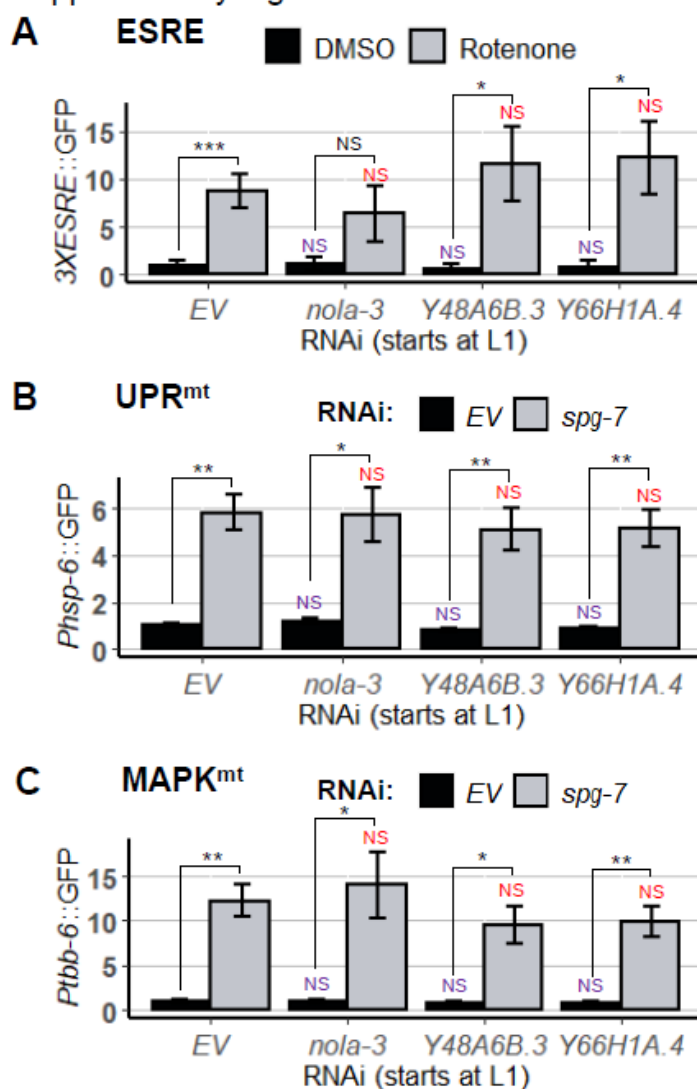

**RNAi targeting core members of box H/ACA snoRNPs did not affect mitochondrial surveillance pathways.**

Quantification of GFP fluorescence of *C. elegans* carrying (A) 3XESRE::GFP, (B) *Phsp-6*::GFP, and (C) *Ptb-6*::GFP reporters that were reared on *E. coli* expressing empty vector (EV) or RNAi targeting box H/ACA snoRNP members: *nola-3/Nop10*, *Y48A6B.3/Nhp2*, and *Y66H1A.4/Gar1*. In (A), worms were treated for 8 h with vehicle (DMSO) or 50  $\mu$ M rotenone. In (B, C), double RNAi was performed with empty vector (EV) or *spg-7*(RNAi). Three biological replicates with ~400 worms/replicate were analyzed. Error bars represent SEM. *p* values were determined from one-way ANOVA, followed by Dunnett's test, and Student's *t*-test. All fold changes were normalized to DMSO-EV or EV control. NS not significant, \**p* < 0.05, \*\* *p* < 0.01, \*\*\* *p* < 0.001.

208

209



210 *Suppressing translation does not recapitulate changes in mitochondrial surveillance caused by disrupting*  
211 *the box C/D snoRNP complex*

212 2'-O-methylation has a number of effects on ribosome maturation and stability. One possible  
213 consequence of disrupting ribosomal biology is a global reduction in translation (50, 51). Translation  
214 efficiency is known to be a target of surveillance in *C. elegans* (1, 2). Importantly it was recently shown  
215 that *fib-1/FBL* knockdown activates *irg-1*, an innate immune reporter, (38) and we recapitulated these  
216 data and observed increased reporter expression on *nol-56(RNAi)* and *nol-58(RNAi)* (**Supplementary**  
217 **Figure 3A**). *irg-1* is known to respond to translational inhibition, including exposure to exotoxin A,  
218 hygromycin (1, 2), or cycloheximide (**Supplementary Figure 3B**). For these reasons, Tiku *et al*,  
219 hypothesized that knockdown of fibrillarlin results in the suppression of translation, triggering activation  
220 of innate immunity. Thus, we set out to explore whether the decreased levels of the ESRE reporter  
221 following *fib-1(RNAi)* are caused by the same mechanism. We tested whether snoRNPs regulate ESRE by  
222 modulating translation. We used RNAi to target the genes encoding components of the eukaryotic 48S  
223 transcription initiation complex, including *clu-1/eIF3A*, *inf-1/eIF4A*, *ife-2/eIF4E*, *ifg-1/eIF4G*, and  
224 *T12D8.2/eIF4H*. Since RNAi targeting *ifg-1/eIF4G* and *inf-1/eIF4A* compromised development when RNAi  
225 was started at the L1 stage, subsequent experiments were performed by feeding RNAi starting at the L3  
226 stage of development.

227 Disrupting the 48S complex had no consistent effect on the expression of reporters for the  
228 mitochondrial surveillance pathway, with the exception of *inf-1/eIF4A(RNAi)*, which showed a reduction  
229 in rotenone-mediated ESRE activation and *spg-7*-mediated UPR<sup>mt</sup> activation, and increased basal  
230 expression of MAPK<sup>mt</sup> (**Figure 6**). However, induction of the *Phsp-6::GFP* reporter by *spg-7(RNAi)* was  
231 also significantly decreased for *clu-1/eIF3A(RNAi)*, *ifg-1/eIF4G(RNAi)*, and *ife-2/eIF4E(RNAi)*, suggesting  
232 some specialized interactions (**Figure 6B**).

233 As a final test, we treated reporter worms for each of the three mitochondrial surveillance pathways  
234 with the chemical translational inhibitor cycloheximide under conditions where *irg-1* activation was  
235 observed (see **Supplementary Figure 3**). Cycloheximide did not alter ESRE or MAPK<sup>mt</sup> reporter  
236 expression (**Supplementary Figure 4**). These results indicated that general translational reduction is  
237 unlikely to be the mechanism that underlies box C/D snoRNP regulation of the ESRE mitochondrial  
238 surveillance network.  
239

### Supplementary Figure 3.

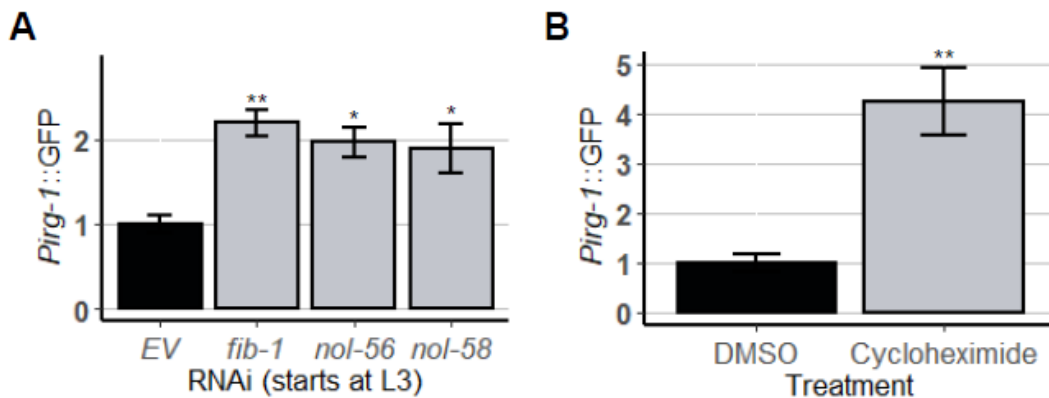

#### Knockdown of box C/D snoRNPs induced immune response gene *irg-1*.

Quantification of GFP fluorescence of *C. elegans* carrying *Pirtg-1::GFP* reporter. In (A), worms were reared on *E. coli* expressing empty vector (EV), *fib-1*(RNAi), *nol-56*(RNAi), or *nol-58*(RNAi). In (B), worms were treated for 8 h with vehicle (DMSO) or translation elongation inhibitor cycloheximide. Three biological replicates with ~400 worms/replicate were analyzed. Error bars represent SEM. *p* values were determined from (A) one-way ANOVA, followed by Dunnett's test, or (B), Student's *t*-test. Fold changes were normalized to (A) EV control or (B) DMSO control. \**p* < 0.05, \*\* *p* < 0.01.

240

Figure 6.

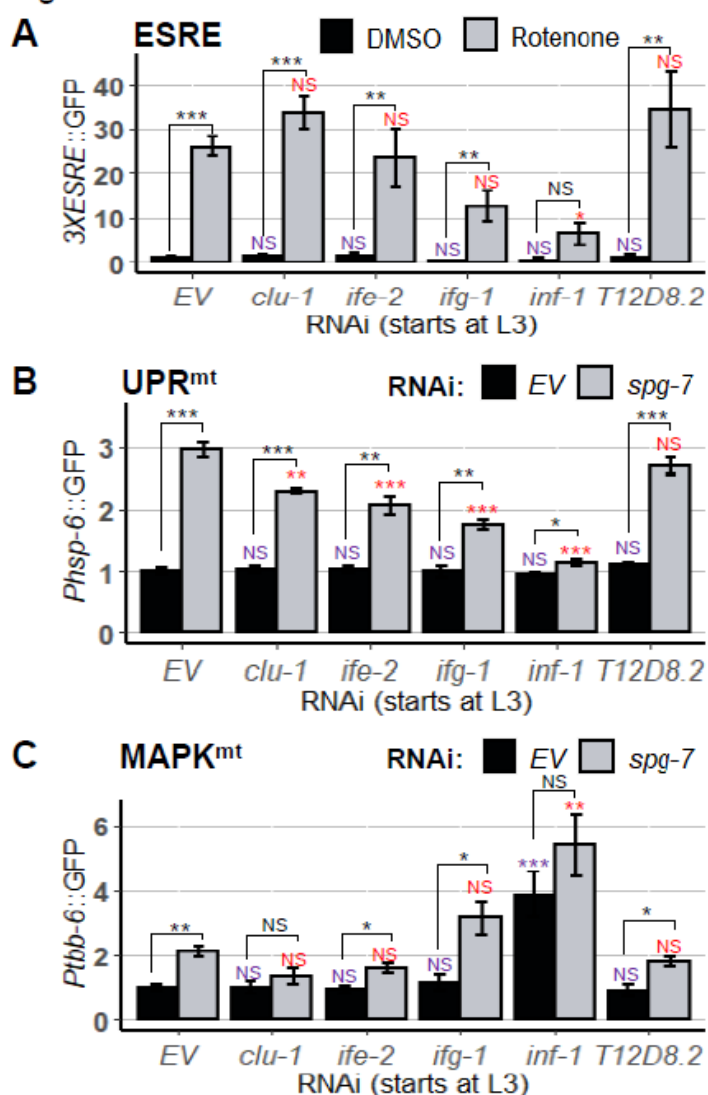

**RNAi targeting eukaryotic initiation factors partially affected the mitochondrial surveillance pathways.**

Quantification of GFP fluorescence of *C. elegans* carrying (A) 3XESRE::GFP, (B) Phsp-6::GFP, and (C) Pttb-6::GFP reporters that were reared on *E. coli* expressing empty vector (EV) or RNAi targeting several eukaryotic initiation factors: *clu-1/eIF3A*, *ife-2/eIF4E*, *ifg-1/eIF4G*, *inf-1/eIF4A*, and T12D8.2/eIF4H. In (A), worms were treated for 8 h with vehicle (DMSO) or 50  $\mu$ M rotenone. In (B, C), double RNAi was performed with empty vector (EV) or *spg-7*(RNAi). Three biological replicates with ~400 worms/replicate were analyzed. Error bars represent SEM. *p* values were determined from one-way ANOVA, followed by Dunnett's test, and Student's *t*-test. All fold changes were normalized to DMSO-EV or EV control. NS not significant, \**p* < 0.05, \*\**p* < 0.01, \*\*\**p* < 0.001.

241

## Supplementary Figure 4.

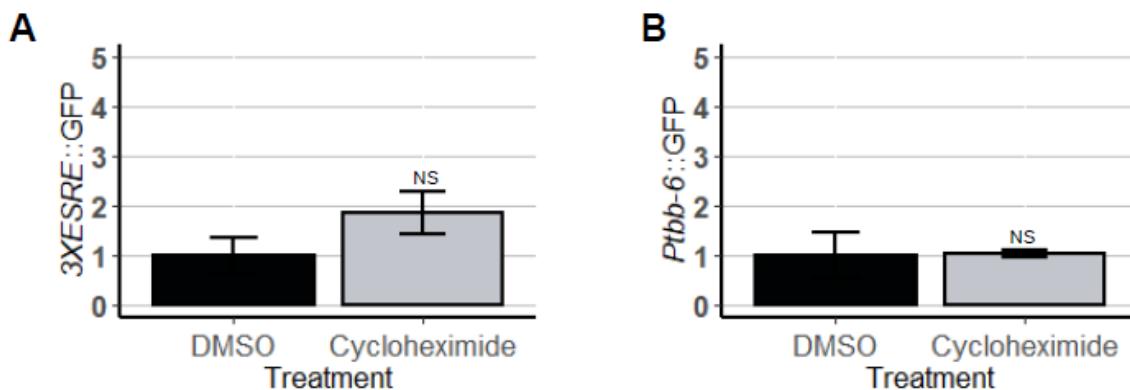

### Cycloheximide treatment did not affect mitochondrial surveillance pathways.

Quantification of GFP fluorescence of *C. elegans* carrying (A) 3XESRE::GFP or (B) Ptb-6::GFP reporters that were treated for 8 h with vehicle (DMSO) or translation elongation inhibitor cycloheximide. Three biological replicates with ~400 worms/replicate were analyzed. Error bars represent SEM. *p* values were determined from Student's *t*-test. NS not significant.

242

### 243 Box C/D snoRNPs repress innate immune responses

244 As mentioned above, fibrillar knockdown has previously been linked to increased pathogen  
245 resistance (38), and we and others observed increased expression *Pirg-1::GFP*, an immune reporter, in  
246 *fib-1(RNAi)* worms (Supplementary Figure 3). To test whether disruption of the box C/D snoRNP  
247 complex induced other cellular defense pathways, we monitored the expression of *Pirg-5::GFP* reporter,  
248 which is activated by a number pathogens and xenobiotics (52, 53) and is relatively insensitive to  
249 translational inhibition (Figure 7A and (2)).

250 Worms carrying the *Pirg-5::GFP* reporter were reared on either empty vector or RNAi targeting  
251 components of the box C/D snoRNP complex starting at L1, and then GFP expression was evaluated in  
252 young adults. Interestingly, this disruption activated *irg-5* more strongly than *P. aeruginosa* infection on  
253 agar in empty vector controls (Figure 7B). It is also worth noting that *P. aeruginosa* infection of worms  
254 with RNAi targeting *fib-1* and *nol-58* did not increase GFP expression any further than in their uninfected

255 counterparts, suggesting that *irg-5* induction may have already been maximized.

Figure 7.

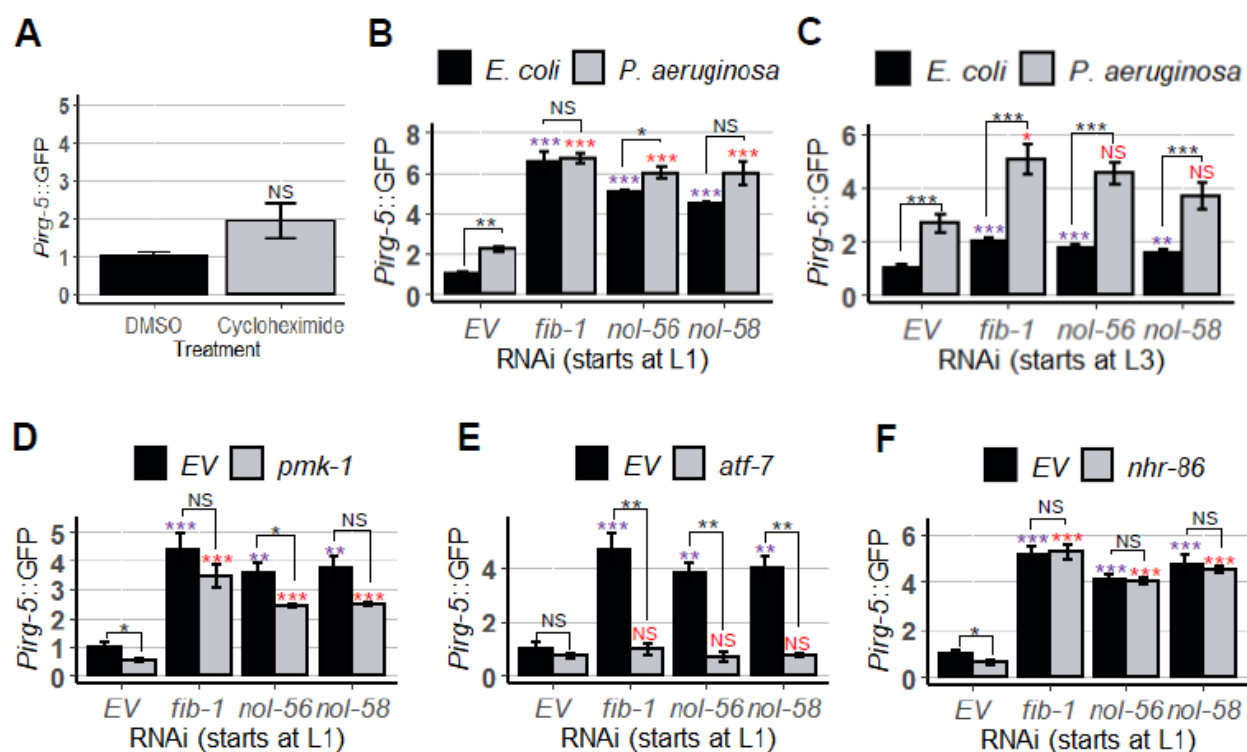

**Knockdown of box C/D snoRNPs increased immune response.**

Quantification of GFP fluorescence of *C. elegans* carrying *Pirg-5::GFP* reporter. In (A), worms were treated for 8 h with vehicle (DMSO) or translation elongation inhibitor cycloheximide. In (B-F), worms were reared on *E. coli* expressing empty vector (EV) as control and *fib-1*(RNAi), *nol-56*(RNAi), or *nol-58*(RNAi). RNAi treatment was started at (B, D, E, F) L1 or (C) L3 stage. In (B-C), young adult worms were transferred onto plates containing *E. coli* or *P. aeruginosa* and let roamed for 8 h. In (D-F), GFP fluorescence were measured on basal levels. Three biological replicates with ~400 worms/replicate were analyzed. Error bars represent SEM. *p* values were determined from one-way ANOVA, followed by Dunnett's test, and Student's *t*-test. All fold changes were normalized to EV control on *E. coli*. NS not significant, \**p* < 0.05, \*\* *p* < 0.01, \*\*\* *p* < 0.001.

256

257 As we had observed previously, box C/D RNAi affected ESRE induction differently when RNAi was  
 258 started at L1 vs L3. Specifically, increased basal induction was much stronger when RNAi feeding was  
 259 initiated at the L1 stage (Figure 7B-C). This observation is also consistent with our interpretation that  
 260 *Pirg-5::GFP* expression is nearly saturated when box C/D is knocked down early in development (Figure

261 **7B)**. These results indicate that early developmental C/D snoRNP complexes are required for  
262 appropriate innate immune function later in development.

263 As *irg-5* was not significantly upregulated by the presence of cycloheximide, i.e., by translational  
264 repression, snoRNPs are likely to affect innate immune pathways via multiple mechanisms. *irg-5* is  
265 known to be controlled by several transcriptional regulators, including PMK-1/p38 MAPK and ATF-  
266 7/ATF7 (53), both which are established regulators of innate immunity in *C. elegans* (54). ATF-7/ATF7  
267 functions downstream of PMK-1/p38 MAPK, but it can regulate *irg-5* activation in response to small  
268 molecule immune stimulator RPW-24 independently of PMK-1/p38 MAPK (53). NHR-86/HNF4 also  
269 regulates *irg-5* expression, specifically in response to the xenobiotic compound RPW-24 (55). To  
270 determine whether any of these transcriptional regulators were involved in box C/D regulation of innate  
271 immunity, we compared *Pirg-5::GFP* expression in worms with double RNAi targeting *fib-1/Fibrillarin*,  
272 *nol-56/Nop56*, or *nol-58/Nop58* and *pmk-1(RNAi)*, *atf-1(RNAi)*, or *nhr-86(RNAi)*.

273 Both *pmk-1(RNAi)* (**Figure 7D**) and *atf-7(RNAi)* (**Figure 7E**) reduced *Pirg-5::GFP* expression, with the  
274 latter virtually abolishing its expression. *nhr-86(RNAi)* (**Figure 7F**) had no apparent effect. These data  
275 suggest that the effects of the box C/D snoRNP complex on *irg-5* are upstream of its known regulation  
276 by the ATF-7/ATF7.

277 This led us to question whether ATF-7 is involved in the regulation of other reporters that are  
278 differentially expressed under box C/D disruption. To test the *3XESRE::GFP* reporter, worms were reared  
279 on combinations of empty vector, *fib-1(RNAi)*, *atf-7(RNAi)*, or both starting at the L3 stage. Young adults  
280 were then exposed to rotenone and reporter induction was observed. Knockdown of *atf-7* was  
281 indistinguishable from vector control (red “NS” mark), and *atf-7(RNAi);fib-1(RNAi)* was not different  
282 from just *fib-1(RNAi)* (blue “NS” mark) (**Figure 8A**). This indicates that the box C/D regulation of ESRE is  
283 independent of ATF-7 and is different from the regulation of *irg-5*.

Figure 8.

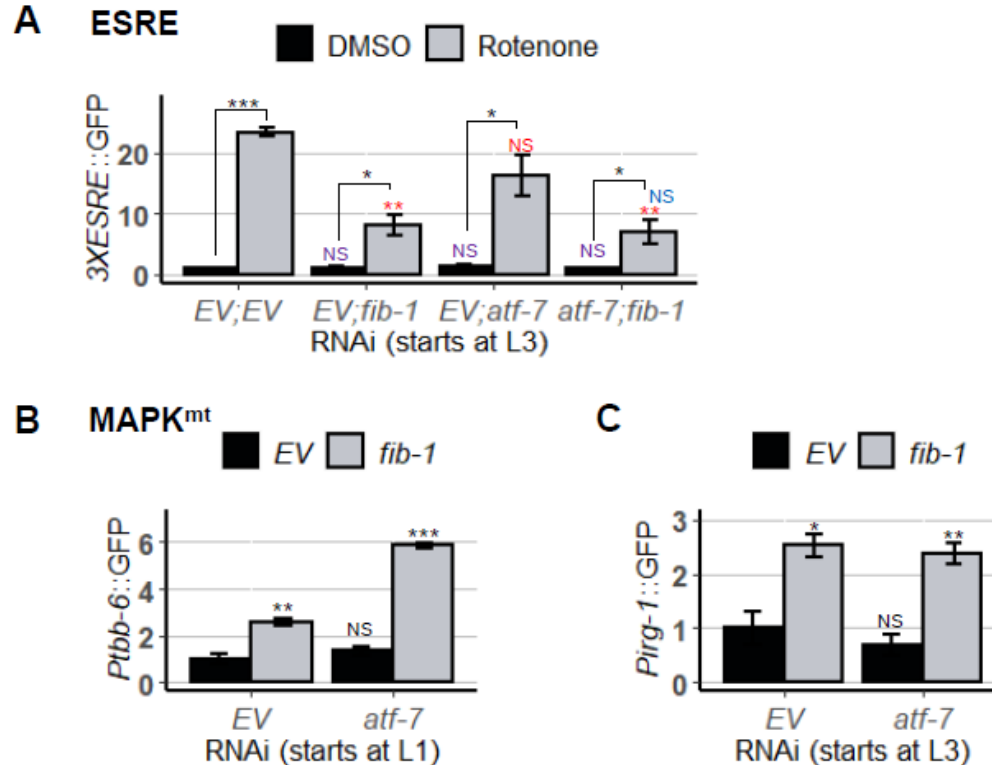

**Knockdown of *atf-7* did not affect mitochondrial surveillance pathways.**

Quantification of GFP fluorescence of *C. elegans* carrying (A) 3XESRE::GFP, (B) *Ptbb-6*::GFP, or (C) *Pirg-1*::GFP reporters. Worms were reared on *E. coli* expressing empty vector (EV) as control or RNAi targeting *fib-1*, *atf-7*, or *atf-7* and *fib-1*. Three biological replicates with ~400 worms/replicate were analyzed. Error bars represent SEM. *p* values were determined from one-way ANOVA, followed by Dunnett's test, and Student's *t*-test. All fold changes were normalized to EV control. NS not significant, \**p* < 0.05, \*\**p* < 0.01, \*\*\**p* < 0.001.

284

285 We also tested whether the increase in basal expression of *Ptbb-6*::GFP after *fib-1*(RNAi) was related

286 to ATF-7 by rearing the reporter on *fib-1*(RNAi) alone or with *atf-7*(RNAi) starting at the L1 larval stage.

287 As expected, basal levels of the reporter were increased after *fib-1*(RNAi) but not by *atf-7*(RNAi) alone

288 (Figure 8B). However, we did observe an additive effect on *Ptbb-6*::GFP in *atf-7*(RNAi);*fib-1*(RNAi),

289 suggesting that the two genes work together to limit inappropriate expression of the MAPK<sup>mt</sup> pathway.

290 *atf-7*(RNAi) did not affect expression of *irg-1*, an immune effector whose basal expression is also

291 upregulated upon box C/D snoRNP knockdown (**Figure 8C**). This suggest that box C/D snoRNPs exhibit  
292 complex modulation of innate immune pathways. Although our previous experiments had ruled out a  
293 role box H/ACA snoRNPs, in the regulation of mitochondrial surveillance (**Supplementary Figure 2**), we  
294 wanted to investigate their role in innate immunity. A knockdown of box H/ACA did not invoke any  
295 response from the immune genes *irg-1* and *irg-5* (**Supplementary Figure 5**), confirming the specificity of  
296 box C/D snoRNPs.

### Supplementary Figure 5.

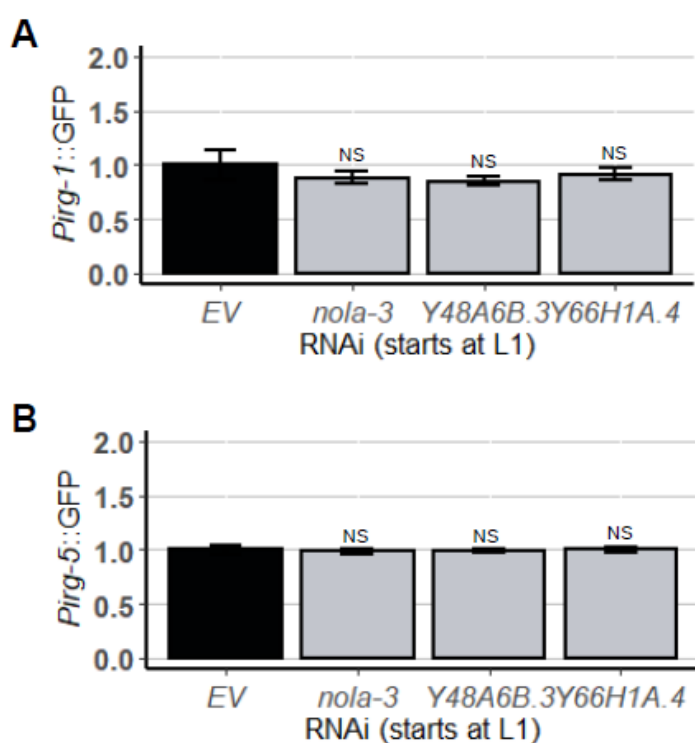

#### RNAi targeting core members of box H/ACA snoRNPs did not affect innate immune pathways.

Quantification of GFP fluorescence of *C. elegans* carrying (A) *Pirg-1::GFP* and (B) *Pirg-5::GFP* reporters that were reared on *E. coli* expressing empty vector (EV) or RNAi targeting box H/ACA snoRNP members: *nola-3/Nop10*, *Y48A6B.3/Nhp2*, and *Y66H1A.4/Gar1*. Three biological replicates with ~400 worms/replicate were analyzed. Error bars represent SEM. *p* values were determined from one-way ANOVA, followed by Dunnett's test. All fold changes were normalized to EV control. NS not significant.

297



298 *The loss of box C/D snoRNPs reduced survival in liquid-based P. aeruginosa killing assay*

299 To test whether the loss of box C/D snoRNPs had physiologically relevant consequences, we  
300 performed *P. aeruginosa* Liquid Killing and Slow Killing assays to measure survival. Although both assays  
301 use the same pathogen, the virulence and pathogenic mechanisms and the host defenses differ. In the  
302 Liquid Killing assay, host death occurs due to the production of the siderophore pyoverdine, which is  
303 secreted by the bacterium to obtain iron (26, 56). Pyoverdine enters host tissue and removes iron from  
304 mitochondria, causing sufficient damage to inflict death (57, 58). This damage also activates the ESRE  
305 mitochondrial surveillance network, which is important for host defense (20).

306 The Slow Killing assay is more traditional form of bacterial pathogenesis, where the host intestine is  
307 colonized by the pathogen, and killing involves quorum sensing, although the precise cause of death has  
308 not yet been determined (59, 60). Slow Killing activates the conventional NSY-1/SEK-1/PMK-1 MAPK  
309 pathway, which is the most common antibacterial defense in *C. elegans* (61-63). Interestingly, there  
310 appears to be little overlap between the two defense networks, as the Slow Killing pathway has no  
311 activation of ESRE and PMK-1 activity is actually detrimental for survival under Liquid Killing conditions  
312 (25, 64).

313 Worms were reared on RNAi targeting *fib-1/Fibrillarlin*, *nol-56/Nop56*, or *nol-58/Nop58* from the L3  
314 larval stage, and then young adults were exposed to *P. aeruginosa* strain PA14 either under Liquid Killing  
315 or Slow Killing conditions. As anticipated based on the role of ESRE in improving survival in Liquid Killing  
316 and the observation that box C/D snoRNP knockdown compromises ESRE function, removal of box C/D  
317 function strongly reduced host survival (**Figure 9A**). Interestingly, we saw the opposite in Slow Killing,  
318 where box C/D snoRNP RNAi slightly, but statistically significantly, increased host survival during *P.*  
319 *aeruginosa* intestinal infection (**Figure 9B**). This is consistent with a prior report that FIB-1 reduces host  
320 survival during infection (38).

Figure 9.

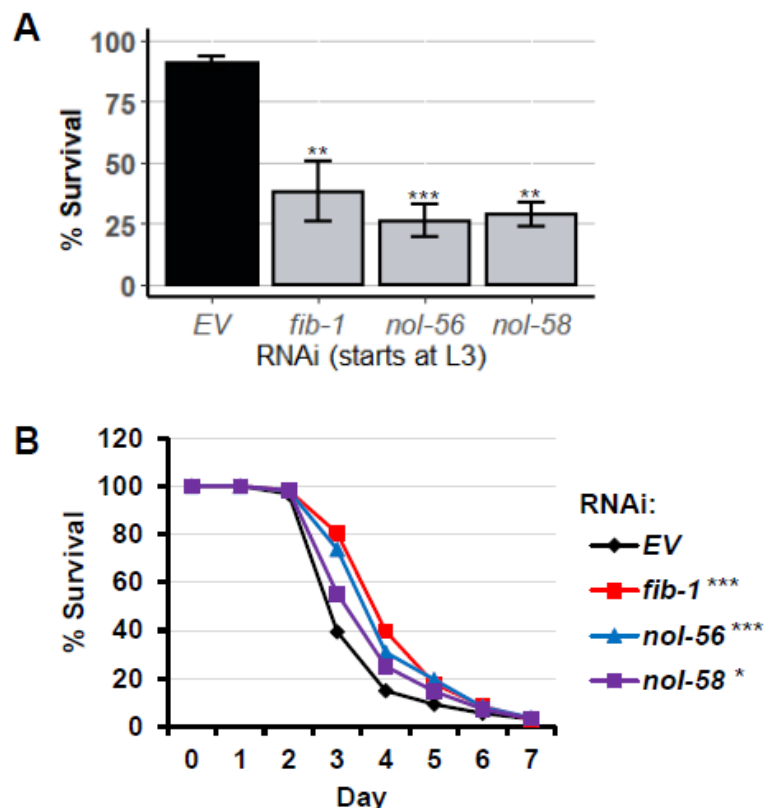

**The loss of box C/D snoRNPs had opposing effect on two *P. aeruginosa* pathogenesis assays.**

Survival of *glp-4(bn2)* worms grown on RNAi strains targeting box C/D snoRNPs in (A) Liquid Killing and (B) Slow killing assays. Three biological replicates with ~400 worms/replicate for LK or ~150 worms/replicate for SK were analyzed. The average of all replicates is shown for each panel. Error bars represent SEM. Fold changes were normalized to EV control. *p* values were determined from one-way ANOVA, followed by Dunnett's test for LK or log-rank test for SK. \**p* < 0.05, \*\**p* < 0.01, \*\*\**p* < 0.001.

321

322 **Discussion**

323 In this study, we identified a role for the box C/D snoRNP complex in regulating the switch between  
324 mitochondrial surveillance and innate immunity. Using biochemical approaches, we made the  
325 unexpected discovery that FIB-1/Fibrillarlin and NOL-56/Nop56 were associated with a tandem repeat of  
326 the ESRE motif. This is unexpected for two reasons. First, the RNA sequences that box C/D snoRNAs are  
327 named for, the C (RUGAUGA) and D (CUGA) boxes, have been well-studied. These bear very little

328 sequence similarity to the ESRE motif (**TCTGCGTCTCT**). Although these are each consensus and have  
329 some variability, there is essentially no match, so it seems unlikely that the proteins are recognizing the  
330 ESRE site directly. Second, as noted above, NOL-56/Nop56 appears to recognize one of the protein  
331 components of box C/D snoRNPs, which means that the snoRNA is likely to be present.

332 Box C/D snoRNPs have recently been linked to an increasing variety of function, including rare cases  
333 of guiding RNA editing (65), tRNA methylation (66), and even association with mRNA (including an  
334 ‘orphan’ snoRNA with no known rRNA target that destabilizes several mRNAs) (67, 68). Additionally,  
335 snoRNAs are more frequently found in the cytoplasm after exposure to oxidative stress or heat shock  
336 (69-71), suggesting the possibility that snoRNAs could be leaving the nucleolus to regulate ESRE genes by  
337 methylating mRNAs. But this also seems to be an unlikely mechanism for what we observed.  
338 Approximately 50 box C/D snoRNAs are predicted in the genome of *C. elegans*. In contrast, the ESRE  
339 nucleotide motif is present in the promoter region of ~8% of predicted genes (22). This numerical  
340 discrepancy makes it rather unlikely that a single snoRNA is responsible for the regulation of all of them,  
341 unless it recognizes the ESRE consensus sequence. None of the snoRNAs predicted in the *C. elegans*  
342 genome are obvious candidates for recognizing the ESRE motif; in all cases we are aware of, the  
343 hybridization sequence is located between the C and D boxes of the snoRNA, and none of these  
344 matched ESRE.

345 An alternative hypothesis is that stress signals change snoRNP expression or targeting, resulting in  
346 changes to rRNA modification patterns. Most known box C/D snoRNP targets are in rRNA, and it is worth  
347 noting that some of these are not saturated and the degree to which some sites are modified is  
348 associated with cellular stress (72). This has led to the suggestion that there may be different  
349 populations of ribosomes within cells, some with specialized functions. This could include ribosomes  
350 that more efficiently express stress-responsive genes, altering the transcriptome of the cells. The well-

351 known integrated stress response, where eIF-2 $\alpha$  is phosphorylated and cap-dependent mRNA  
352 translation is substantially decreased in favor of translation from structured mRNA elements called  
353 internal ribosomal entry sites, or IRESes (16), is an example of one such condition. Changes to the  
354 ribosome could then facilitate specification for structured mRNAs.

355 In this case, we would see increased ESRE gene expression during stress. While we do see increased  
356 expression of ESRE genes during stress, this is at least partially due to transcriptional changes, and we  
357 have not yet seen evidence of translational differences. However, ESRE genes are not known to be  
358 activated by translational inhibitors like *P. aeruginosa* exotoxin A or hygromycin (1). Targeting the 48S  
359 pre-initiation complex here (**Figure 6A**) also did not activate ESRE gene regulation. Additionally, we saw  
360 no changes in ESRE gene expression when components of the box H/ACA snoRNP complex were  
361 disrupted. rRNA modification by these ribonucleoprotein complexes are also important and would also  
362 be expected to affect transcription if this were mechanism of ESRE gene regulation. Additionally, stress-  
363 responsive ribosomal modifications do not explain the association of the box C/D snoRNP complexes  
364 with the ESRE motif.

365 Importantly, we found that two immune effectors, *irg-1* (**Supplementary Figure 3** and (38)) and *irg-*  
366 *5*, were upregulated by the absence of box C/D snoRNPs. This is consistent with many reports that  
367 disruption of core cellular processes activates innate immune processes (1, 9, 29). In this case, the loss  
368 of box C/D snoRNPs activated *irg-1* via translation suppression (38) and *irg-5* through an unknown  
369 mechanism. Interestingly, only the loss of ATF-7/ATF7, a transcription factor that regulates *irg-5*  
370 response to pathogen attack (and partially to xenobiotic compound), was able to completely abolish *irg-*  
371 *5* induction by RNAi targeting box C/D snoRNP machinery. This indicated that ATF-7/ATF7, partially  
372 independently of PMK-1/p38 MAPK, regulated *irg-5* expression in response to the loss of box C/D  
373 snoRNPs. This is similar to *irg-5* induction by the immune stimulator RPW-24 (53). However in this case,

374 knockdown of *nhr-86/HNF4* did not abolish *irg-5* expression, suggesting a different biological  
375 significance of the activation of this ATF-7/ATF7-dependent immune pathway.

376 We propose that the box C/D snoRNPs act as a molecular switch that activate quality control  
377 pathways while inhibiting immune responses (**Figure 10**). The purpose of this novel mechanism may be  
378 to allow mitochondria an opportunity to repair before other cellular defenses (that require extensive  
379 energy expenditure) are activated. Future work will focus on understanding the relationships between  
380 these systems.

Figure 10.

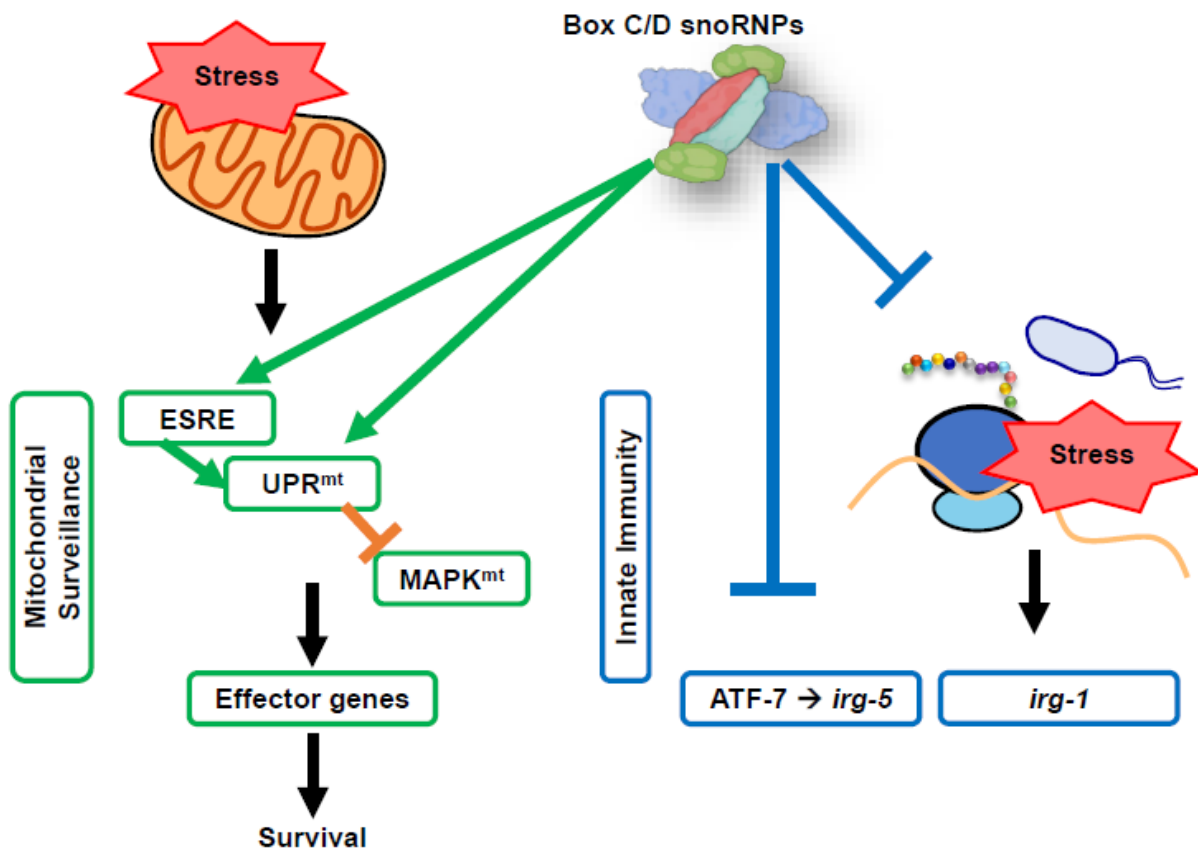

**Proposed model of box C/D snoRNPs roles in cellular pathways regulation.**

Box C/D snoRNPs act as a molecular switch that suppresses innate immunity and activates mitochondrial pathways upon stress.

381

## 382 **Methods**

### 383 ***C. elegans* strains and maintenance**

384 All *C. elegans* strains were maintained on standard nematode growth medium (NGM) (73) seeded  
385 with *Escherichia coli* strain OP50 as a food source and were maintained at 20°C (73), unless otherwise  
386 noted. *C. elegans* strains used in this study included N2 Bristol (wild-type), SS104 [*glp-4(bn2)*], WY703  
387 [*fdls2* [*3XESRE::GFP*]; *pFF4[rol-6(su1006)]*] (27), SJ4100 [*zcls13* [*Phsp-6::GFP*]], [*atfs-1(et15)*; *zcls9* [*Phsp-*  
388 *60::GFP*]] (74), NVK235 (*zcls13*; *Patfs-1ΔESRE::ATFS-1<sup>WT</sup>*) (21), SLR115 [*dvl67* [*Ptbb-6::GFP* + *Pmyo-*  
389 *3::dsRed*]] (18), AY101 [*acls101* [*pDB09.1(Pirg-5::GFP)*; *pRF4[rol-6(su1006)]*]] (52), and AU133  
390 [*agls17*[*Pmyo-2::mCherry* + *Pirg-1::GFP*]] (2).

391 Worms were synchronized by hypochlorite isolation of eggs from gravid adults, followed by hatching  
392 of eggs in S Basal. 6000 synchronized L1 larvae were transferred onto 10 cm NGM plates seeded with  
393 OP50. After transfer, worms were grown at 20°C for 50 hours prior to experiments, or for three days for  
394 the next eggs isolation. Young adult worms were used for all assays unless otherwise noted.

395

### 396 **Bacterial strains**

397 RNAi experiments in this study were done using RNAi-competent HT115 obtained from the Ahringer or  
398 Vidal RNAi library (75, 76) and were sequenced prior to use. For *P. aeruginosa*, PA14 strain was used  
399 (77).

400

### 401 **RNA interference protocol**

402 RNAi-expressing bacteria were cultured and seeded onto NGM plates supplemented with 25 µg/mL  
403 carbenicillin and 1 mM IPTG. When double RNAi was performed, bacteria cultures were mixed with a 1:1  
404 ratio. For RNAi experiment starting at L1, 2000 synchronized L1 larvae were transferred onto 6 cm RNAi

405 plates and grown at 20°C for 50 hours prior to imaging or exposure to chemical compounds or  
406 pathogens. For RNAi experiment starting at L3, 2500 synchronized L1 larvae were transferred onto 6 cm  
407 regular NGM plates seeded with OP50 and grown at 20°C for 20 hours until reaching the L3 stage.  
408 Worms were then washed off plates, rinsed three times, and transferred onto RNAi plates. Worms were  
409 grown at 20°C for 30 hours on RNAi plates prior to use for experiments.

410

#### 411 **Electrophoretic Mobility Shift Assay (EMSA) and Oligo Pull-down**

412 Cytoplasmic and nuclear protein extraction was performed with Pierce Cytoplasmic and Nuclear  
413 Extraction Kit according to the manufacturer's protocol.

414 EMSA was performed by using LightShift® Chemiluminescent EMSA Kit (ThermoFisher). In short,  
415 synchronized young adult *glp-4(bn2)* worms were exposed to heat shock for 16 h, 1,1-phenanthroline 1  
416 mM for 20 h, rotenone 50 µM for 14 h, or DMSO (solvent control). Worms' nuclear-enriched extract was  
417 incubated for 20 minutes at room temperature with biotinylated oligos (3XESRE or 4XESRE) as bait in the  
418 appropriate binding conditions (50 ng/µL poly (dI•dC), 5% glycerol, 0.1% NP-40, 2.5 mM MgCl<sub>2</sub>, 1 mM  
419 EDTA, and 20 fmol biotinylated oligos). Binding reactions were then loaded for electrophoresis in a  
420 polyacrylamide gel until the dye front had migrated  $\frac{3}{4}$  down the length of the gel. Binding reactions  
421 were then transferred to a nylon membrane for 30 minutes at 380 mA. DNA on the membrane was then  
422 crosslinked at 120 mJ/cm<sup>2</sup> by using a UV-light crosslinking instrument. Biotin-labeled DNA was then  
423 detected with a series of detection steps before finally exposed to X-ray film.

424 Oligo pulldown was performed according to the manual for DynaBeads M-280 Streptavidin  
425 (ThermoFisher). In short, magnetic beads were first washed with Binding and Washing buffer (BW 2X)  
426 (10 mM Tris-HCl pH 7.5, 1 mM EDTA, and 2 M NaCl). Beads were then coupled with the biotinylated-  
427 4XESRE oligos bait for 15 minutes (with BW 1X). Coated beads were resuspended in PBS buffer (0.1 M

428 phosphate, 0.15 M NaCl) pH 7.4 and then incubated with worm nuclear extract for 2 hours at room  
429 temperature, washed, and eluted. Elution samples were sent for tandem MS/MS.

430

### 431 ***C. elegans* chemical exposure assays**

432 Synchronized young adult worms were washed from NGM plates seeded with OP50 into a 15 mL conical  
433 tube and rinsed three times. Worms were then sorted into a 96-well plate (~100 worms/well). S Basal  
434 supplemented with 50  $\mu$ M rotenone (Sigma), 2 mg/mL cycloheximide (Sigma), or DMSO (solvent control)  
435 was then added into the wells of the 96-well plate to a final volume of 100  $\mu$ L. Worms were imaged with  
436 Cytation5 automated microscope every two hours for twenty hours. At least three biological replicates  
437 were performed for each experiment.

438

### 439 ***C. elegans* pathogenesis assays**

440 Liquid killing was performed essentially as described (56, 78). 25 synchronized young adult worms  
441 were sorted into 384-well plate. Liquid killing medium was mixed with *P. aeruginosa* PA14 (final OD<sub>600</sub>:  
442 0.03), and then added into each well. Plates were incubated at 25°C. At time points, plates were washed  
443 three times and worms were stained with SYTOX™ Orange nucleic acid stain for 12 h to stain dead  
444 worms. Plates were then washed and imaged for with Cytation5 automated microscope and dead  
445 worms were quantified with CellProfiler.

446 Slow Killing was performed as previously described (79). 50 young adult worms were transferred  
447 onto PA14-SK plates and incubated at 25°C. Worms were scored every day for survival curve; dead  
448 worms were removed from assay plates.

449 *P. aeruginosa* exposure to worms carrying *Pirg-5::GFP* (AY101) was performed similarly as SK assay.  
450 500 worms were transferred onto PA14-SK plates. After 8 h, worms were washed off plates into a 96-



451 well plate and washed several times to remove bacteria. Imaging and GFP quantification were  
452 performed with Cytation5 automated microscope and Gen5 3.0 software.

453

#### 454 **Imaging and Fluorescence Quantification**

455 For visualization of the worm reporter strains AU133, AY101, NVK235, SJ4100, SLR115, and WY703 in 96-  
456 well plates, Cytation5 Cell Imaging Multi-Mode Reader (BioTek Instruments) was used. All imaging  
457 experiments were performed with identical settings. GFP quantifications were performed by using Gen5  
458 3.0 software and via flow vermimetry (Union Biometrica).

459

#### 460 **Statistical Analysis**

461 RStudio (version 3.6.3) was used to perform statistical analysis. One-way analysis of variance (ANOVA)  
462 was performed to calculate the significance of a treatment when there were three or more groups in the  
463 experimental setting. To follow, Dunnett's test (R package DescTools, version 0.99.34) was performed to  
464 calculate statistical significance or  $p$  values between each group of the statistically significant  
465 experimental results. Student's t test analysis was performed to calculate the  $p$  values when comparing  
466 two groups in an experimental setting. Both Dunnett's test and Student's t test results were indicated in  
467 graphs as follows: NS not significant,  $*p < 0.05$ ,  $**p < 0.01$ , and  $***p < 0.001$ .

468

469 **Acknowledgements:** *C. elegans* strains used were provided by David Fay, Cole Haynes, or obtained from  
470 the CGC, which is funded by NIH Office of Research Infrastructure Programs (P40 OD010440). We  
471 thank Daniel Kirienko for helpful discussion. NVK, a CPRIT scholar in Cancer Research, thanks the Cancer  
472 Prevention and Research Institute of Texas (CPRIT) for their generous support, CPRIT grant RR150044.  
473 This work was also supported by the National Institutes of Health (NIGMS R35GM129294 to NK).

474

475 **Competing interests:** The authors have declared that no competing interests exist.

476

477 **References**

478

479 1. McEwan Deborah L, Kirienko Natalia V, Ausubel Frederick M. Host Translational Inhibition by  
480 *Pseudomonas aeruginosa* Exotoxin A Triggers an Immune Response in *Caenorhabditis elegans*. *Cell Host*  
481 & *Microbe*. 2012;11(4):364-74.

482 2. Dunbar Tiffany L, Yan Z, Balla Keir M, Smelkinson Margery G, Troemel Emily R. *C. elegans*  
483 Detects Pathogen-Induced Translational Inhibition to Activate Immune Signaling. *Cell Host & Microbe*.  
484 2012;11(4):375-86.

485 3. Doye A, Mettouchi A, Bossis G, Clément R, Buisson-Touati C, Flatau G, et al. CNF1 exploits the  
486 ubiquitin-proteasome machinery to restrict Rho GTPase activation for bacterial host cell invasion. *Cell*.  
487 2002;111(4).

488 4. Garcia-Sanchez JA, Ewbank JJ, Visvikis O. Ubiquitin-related processes and innate immunity in *C.*  
489 *elegans*. *Cell Mol Life Sci*. 2021.

490 5. Jones LM, Chen Y, van Oosten-Hawle P. Redefining proteostasis transcription factors in  
491 organismal stress responses, development, metabolism, and health. *Biol Chem*. 2020;401(9):1005-18.

492 6. Stradal TEB, Schelhaas M. Actin dynamics in host-pathogen interaction. *FEBS Lett*.  
493 2018;592(22):3658-69.

494 7. Alshareef MH, Hartland EL, McCaffrey K. Effectors Targeting the Unfolded Protein Response  
495 during Intracellular Bacterial Infection. *Microorganisms*. 2021;9(4).

496 8. Choi JA, Song CH. Insights Into the Role of Endoplasmic Reticulum Stress in Infectious Diseases.  
497 *Front Immunol*. 2019;10:3147.

498 9. Melo Justine A, Ruvkun G. Inactivation of Conserved *C. elegans* Genes Engages Pathogen- and  
499 Xenobiotic-Associated Defenses. *Cell*. 2012;149(2):452-66.

500 10. Lemichez E, Barbieri J. General aspects and recent advances on bacterial protein toxins. *Cold*  
501 *Spring Harbor perspectives in medicine*. 2013;3(2).

502 11. Khan S, Raj D, Jaiswal K, Lahiri A. Modulation of host mitochondrial dynamics during bacterial  
503 infection. *Mitochondrion*. 2020;53:140-9.

504 12. Tiku V, Tan MW, Dikic I. Mitochondrial Functions in Infection and Immunity. *Trends Cell Biol*.  
505 2020;30(4):263-75.

506 13. Cho DH, Kim JK, Jo EK. Mitophagy and Innate Immunity in Infection. *Mol Cells*. 2020;43(1):10-22.

507 14. Bader V, Winkhofer KF. PINK1 and Parkin: team players in stress-induced mitophagy. *Biol Chem*.  
508 2020;401(6-7):891-9.

509 15. Youle RJ, Narendra DP. Mechanisms of mitophagy. *Nat Rev Mol Cell Biol*. 2011;12(1):9-14.

510 16. Anderson NS, Haynes CM. Folding the Mitochondrial UPR into the Integrated Stress Response.  
511 *Trends Cell Biol*. 2020;30(6):428-39.

512 17. Fiorese CJ, Haynes CM. Integrating the UPR(mt) into the mitochondrial maintenance network.  
513 *Crit Rev Biochem Mol Biol*. 2017;52(3):304-13.

514 18. Munkácsy E, Khan MH, Lane RK, Borrer MB, Park JH, Bokov AF, et al. DLK-1, SEK-3 and PMK-3  
515 Are Required for the Life Extension Induced by Mitochondrial Bioenergetic Disruption in *C. elegans*.  
516 *PLOS Genetics*. 2016;12(7):e1006133.

- 517 19. Oks O, Lewin S, Goncalves IL, Sapir A. The UPR(mt) Protects *Caenorhabditis elegans* from  
518 Mitochondrial Dysfunction by Upregulating Specific Enzymes of the Mevalonate Pathway. *Genetics*.  
519 2018;209(2):457-73.
- 520 20. Tjahjono E, Kirienko NV. A conserved mitochondrial surveillance pathway is required for defense  
521 against *Pseudomonas aeruginosa*. *PLoS Genet*. 2017;13(6):e1006876.
- 522 21. Tjahjono E, McAnena AP, Kirienko NV. The evolutionarily conserved ESRE stress response  
523 network is activated by ROS and mitochondrial damage. *BMC Biology*. 2020;18(1):74.
- 524 22. Kirienko NV, Fay DS. SLR-2 and JMJC-1 regulate an evolutionarily conserved stress-response  
525 network. *EMBO J*. 2010;29(4):727-39.
- 526 23. Kwon JY, Hong M, Choi MS, Kang S, Duke K, Kim S, et al. Ethanol-response genes and their  
527 regulation analyzed by a microarray and comparative genomic approach in the nematode  
528 *Caenorhabditis elegans*. *Genomics*. 2004;83(4):600-14.
- 529 24. Pignataro L, Varodayan FP, Tannenholz LE, Protiva P, Harrison NL. Brief alcohol exposure alters  
530 transcription in astrocytes via the heat shock pathway. *Brain Behav*. 2013;3(2):114-33.
- 531 25. Kirienko NV, Ausubel FM, Ruvkun G. Mitophagy confers resistance to siderophore-mediated  
532 killing by *Pseudomonas aeruginosa*. *Proceedings of the National Academy of Sciences*.  
533 2015;112(6):1821-6.
- 534 26. Kang D, Kirienko DR, Webster P, Fisher AL, Kirienko NV. Pyoverdine, a siderophore from  
535 *Pseudomonas aeruginosa*, translocates into *C. elegans*, removes iron, and activates a distinct host  
536 response. *Virulence*. 2018;9(1):804-17.
- 537 27. Kuzmanov A, Karina EI, Kirienko NV, Fay DS. The Conserved PBAF Nucleosome-Remodeling  
538 Complex Mediates the Response to Stress in *Caenorhabditis elegans*. *Molecular and Cellular Biology*.  
539 2014;34(6):1121-35.
- 540 28. Kirienko NV, McEnerney JD, Fay DS. Coordinated regulation of intestinal functions in *C. elegans*  
541 by LIN-35/Rb and SLR-2. *PLoS Genet*. 2008;4(4):e1000059.
- 542 29. Pukkila-Worley R. Surveillance Immunity: An Emerging Paradigm of Innate Defense Activation in  
543 *Caenorhabditis elegans*. *PLoS Pathog*. 2016;12(9):e1005795.
- 544 30. Anderson S, Cheesman H, Peterson N, Salisbury J, Soukas A, Pukkila-Worley R. The fatty acid  
545 oleate is required for innate immune activation and pathogen defense in *Caenorhabditis elegans*. *PLoS*  
546 *pathogens*. 2019;15(6).
- 547 31. Dasgupta M, Shashikanth M, Gupta A, Sandhu A, De A, Javed S, et al. NHR-49 Transcription  
548 Factor Regulates Immunometabolic Response and Survival of *Caenorhabditis elegans* during  
549 *Enterococcus faecalis* Infection. *Infection and immunity*. 2020;88(8).
- 550 32. Ellis J, Brown D, Brown J. The small nucleolar ribonucleoprotein (snRNP) database. *RNA (New*  
551 *York, NY)*. 2010;16(4).
- 552 33. Ojha S, Malla S, Lyons SM. snoRNPs: Functions in Ribosome Biogenesis. *Biomolecules*.  
553 2020;10(5):783.
- 554 34. Massenet S, Bertrand E, Verheggen C. Assembly and trafficking of box C/D and H/ACA snoRNPs.  
555 *RNA Biol*. 2017;14(6):680-92.
- 556 35. Lee J, Harris AN, Holley CL, Mahadevan J, Pyles KD, Lavagnino Z, et al. Rpl13a small nucleolar  
557 RNAs regulate systemic glucose metabolism. *Journal of Clinical Investigation*. 2016;126(12):4616-25.
- 558 36. Elliott B, Ho H, Ranganathan S, Vangaveti S, Ilkayeva O, Abou A, H, et al. Modification of  
559 messenger RNA by 2'-O-methylation regulates gene expression in vivo. *Nature communications*.  
560 2019;10(1).

- 561 37. Tiku V, Jain C, Raz Y, Nakamura S, Heestand B, Liu W, et al. Small nucleoli are a cellular hallmark  
562 of longevity. *Nature communications*. 2017;8.
- 563 38. Tiku V, Kew C, Mehrotra P, Ganesan R, Robinson N, Antebi A. Nucleolar fibrillar protein is an  
564 evolutionarily conserved regulator of bacterial pathogen resistance. *Nature Communications*.  
565 2018;9(1):3607.
- 566 39. Liang J, Wen J, Huang Z, Chen X, Zhang B, Chu L. Small Nucleolar RNAs: Insight Into Their  
567 Function in Cancer. *Frontiers in oncology*. 2019;9.
- 568 40. Mosser D, Kotzbauer P, Sarge K, Morimoto R. In vitro activation of heat shock transcription  
569 factor DNA-binding by calcium and biochemical conditions that affect protein conformation.  
570 *Proceedings of the National Academy of Sciences of the United States of America*. 1990;87(10).
- 571 41. Saltzman A, Leng M, Bhatt B, Singh P, Chan D, Dobrolecki L, et al. gpGrouper: A Peptide  
572 Grouping Algorithm for Gene-Centric Inference and Quantitation of Bottom-Up Proteomics Data.  
573 *Molecular & cellular proteomics : MCP*. 2018;17(11).
- 574 42. Lafontaine DL, Tollervey D. Synthesis and assembly of the box C+D small nucleolar RNPs. *Mol  
575 Cell Biol*. 2000;20(8):2650-9.
- 576 43. Sheaffer KL, Updike DL, Mango SE. The Target of Rapamycin Pathway Antagonizes pha-4/FoxA to  
577 Control Development and Aging. *Current Biology*. 2008;18(18):1355-64.
- 578 44. Ahringer J. Reverse Genetics. *WormBook*. 2006.
- 579 45. Yoneda T, Benedetti C, Urano F, Clark SG, Harding HP, Ron D. Compartment-specific  
580 perturbation of protein handling activates genes encoding mitochondrial chaperones. *J Cell Sci*.  
581 2004;117(Pt 18):4055-66.
- 582 46. Nargund AM, Pellegrino MW, Fiorese CJ, Baker BM, Haynes CM. Mitochondrial Import Efficiency  
583 of ATFS-1 Regulates Mitochondrial UPR Activation. *Science*. 2012;337(6094):587-90.
- 584 47. Pellegrino MW, Nargund AM, Kirienko NV, Gillis R, Fiorese CJ, Haynes CM. Mitochondrial UPR-  
585 regulated innate immunity provides resistance to pathogen infection. *Nature*. 2014;516(7531):414-7.
- 586 48. Erales J, Marchand V, Panthu B, Gillot S, Belin S, Ghayad SE, et al. Evidence for rRNA 2'-O-  
587 methylation plasticity: Control of intrinsic translational capabilities of human ribosomes. *Proceedings of  
588 the National Academy of Sciences*. 2017;114(49):12934-9.
- 589 49. Penzo M, Montanaro L. Turning Uridines around: Role of rRNA Pseudouridylation in Ribosome  
590 Biogenesis and Ribosomal Function. *Biomolecules*. 2018;8(2).
- 591 50. Kavčič B, Tkačik G, Bollenbach T. Mechanisms of drug interactions between translation-inhibiting  
592 antibiotics. *Nature communications*. 2020;11(1).
- 593 51. Rodnina M. The ribosome in action: Tuning of translational efficiency and protein folding.  
594 *Protein science : a publication of the Protein Society*. 2016;25(8).
- 595 52. Bolz DD, Tenor JL, Aballay A. A Conserved PMK-1/p38 MAPK Is Required in *Caenorhabditis  
596 elegans* Tissue-specific Immune Response to *Yersinia pestis* Infection. *Journal of Biological  
597 Chemistry*. 2010;285(14):10832-40.
- 598 53. Pukkila-Worley R, Feinbaum R, Kirienko NV, Larkins-Ford J, Conery AL, Ausubel FM. Stimulation  
599 of Host Immune Defenses by a Small Molecule Protects *C. elegans* from Bacterial Infection. *PLoS  
600 Genetics*. 2012;8(6):e1002733.
- 601 54. Shivers RP, Pagano DJ, Kooistra T, Richardson CE, Reddy KC, Whitney JK, et al. Phosphorylation  
602 of the Conserved Transcription Factor ATF-7 by PMK-1 p38 MAPK Regulates Innate Immunity in  
603 *Caenorhabditis elegans*. *PLoS Genetics*. 2010;6(4):e1000892.
- 604 55. Peterson N, Cheesman H, Liu P, Anderson S, Foster K, Chhaya R, et al. The nuclear hormone  
605 receptor NHR-86 controls anti-pathogen responses in *C. elegans*. *PLoS genetics*. 2019;15(1).

- 606 56. Kirienko Natalia V, Kirienko Daniel R, Larkins-Ford J, Wählby C, Ruvkun G, Ausubel Frederick M.  
607 *Pseudomonas aeruginosa* Disrupts *Caenorhabditis elegans* Iron Homeostasis, Causing a Hypoxic  
608 Response and Death. *Cell Host & Microbe*. 2013;13(4):406-16.
- 609 57. Kang D, Kirienko NV. An In Vitro Cell Culture Model for Pyoverdine-Mediated Virulence.  
610 *Pathogens*. 2020;10(1).
- 611 58. Kang D, Revtovich AV, Chen Q, Shah KN, Cannon CL, Kirienko NV. Pyoverdine-Dependent  
612 Virulence of *Pseudomonas aeruginosa* Isolates From Cystic Fibrosis Patients. *Front Microbiol*.  
613 2019;10:2048.
- 614 59. Feinbaum RL, Urbach JM, Liberati NT, Djonovic S, Adonizio A, Carvunis AR, et al. Genome-wide  
615 identification of *Pseudomonas aeruginosa* virulence-related genes using a *Caenorhabditis elegans*  
616 infection model. *PLoS Pathog*. 2012;8(7):e1002813.
- 617 60. Lee DG, Urbach JM, Wu G, Liberati NT, Feinbaum RL, Miyata S, et al. Genomic analysis reveals  
618 that *Pseudomonas aeruginosa* virulence is combinatorial. *Genome Biol*. 2006;7(10):R90.
- 619 61. Kim DH, Feinbaum R, Alloing G, Emerson FE, Garsin DA, Inoue H, et al. A conserved p38 MAP  
620 kinase pathway in *Caenorhabditis elegans* innate immunity. *Science*. 2002;297(5581):623-6.
- 621 62. Kim DH, Liberati NT, Mizuno T, Inoue H, Hisamoto N, Matsumoto K, et al. Integration of  
622 *Caenorhabditis elegans* MAPK pathways mediating immunity and stress resistance by MEK-1 MAPK  
623 kinase and VHP-1 MAPK phosphatase. *Proc Natl Acad Sci U S A*. 2004;101(30):10990-4.
- 624 63. Troemel ER, Chu SW, Reinke V, Lee SS, Ausubel FM, Kim DH. p38 MAPK regulates expression of  
625 immune response genes and contributes to longevity in *C. elegans*. *PLoS Genet*. 2006;2(11):e183.
- 626 64. Hummell NA, Revtovich AV, Kirienko NV. Novel Immune Modulators Enhance *Caenorhabditis*  
627 *elegans* Resistance to Multiple Pathogens. *mSphere*. 2021;6(1).
- 628 65. Vitali P, Basyuk E, Le Meur E, Bertrand E, Muscatelli F, Cavaille J, et al. ADAR2-mediated editing  
629 of RNA substrates in the nucleolus is inhibited by C/D small nucleolar RNAs. *J Cell Biol*. 2005;169(5):745-  
630 53.
- 631 66. Vitali P, Kiss T. Cooperative 2'-O-methylation of the wobble cytidine of human elongator  
632 tRNA(Met)(CAT) by a nucleolar and a Cajal body-specific box C/D RNP. *Genes Dev*. 2019;33(13-14):741-  
633 6.
- 634 67. Aw JG, Shen Y, Wilm A, Sun M, Lim XN, Boon KL, et al. In Vivo Mapping of Eukaryotic RNA  
635 Interactomes Reveals Principles of Higher-Order Organization and Regulation. *Mol Cell*. 2016;62(4):603-  
636 17.
- 637 68. Sharma E, Sterne-Weiler T, O'Hanlon D, Blencowe BJ. Global Mapping of Human RNA-RNA  
638 Interactions. *Mol Cell*. 2016;62(4):618-26.
- 639 69. Holley CL, Li MW, Scruggs BS, Matkovich SJ, Ory DS, Schaffer JE. Cytosolic accumulation of small  
640 nucleolar RNAs (snoRNAs) is dynamically regulated by NADPH oxidase. *J Biol Chem*. 2015;290(18):11741-  
641 8.
- 642 70. Chen MS, Goswami PC, Laszlo A. Differential accumulation of U14 snoRNA and hsc70 mRNA in  
643 Chinese hamster cells after exposure to various stress conditions. *Cell Stress Chaperones*. 2002;7(1):65-  
644 72.
- 645 71. Mleczko AM, Machtel P, Walkowiak M, Wasilewska A, Pietras PJ, Bakowska-Zywicka K. Levels of  
646 sdRNAs in cytoplasm and their association with ribosomes are dependent upon stress conditions but  
647 independent from snoRNA expression. *Sci Rep*. 2019;9(1):18397.
- 648 72. Sloan KE, Warda AS, Sharma S, Entian KD, Lafontaine DLJ, Bohnsack MT. Tuning the ribosome:  
649 The influence of rRNA modification on eukaryotic ribosome biogenesis and function. *RNA Biol*.  
650 2017;14(9):1138-52.

- 651 73. Stiernagle T. Maintenance of *C. elegans*. WormBook. 2006:1-11.
- 652 74. Rauthan M, Ranji P, Aguilera Pradenas N, Pitot C, Pilon M. The mitochondrial unfolded protein  
653 response activator ATFS-1 protects cells from inhibition of the mevalonate pathway. Proceedings of the  
654 National Academy of Sciences. 2013;110(15):5981-6.
- 655 75. Kamath RS, Fraser AG, Dong Y, Poulin G, Durbin R, Gotta M, et al. Systematic functional analysis  
656 of the *Caenorhabditis elegans* genome using RNAi. Nature. 2003;421(6920):231-7.
- 657 76. Rual J-F, Ceron J, Koreth J, Hao T, Nicot A-S, Hirozane-Kishikawa T, et al. Toward improving  
658 *Caenorhabditis elegans* phenome mapping with an ORFeome-based RNAi library. Genome research.  
659 2004;14(10b):2162-8.
- 660 77. Mathee K. Forensic investigation into the origin of *Pseudomonas aeruginosa* PA14 - old but not  
661 lost. J Med Microbiol. 2018;67(8):1019-21.
- 662 78. Anderson QL, Revtovich AV, Kirienko NV. A High-throughput, High-content, Liquid-based *C.*  
663 *elegans* Pathosystem. Journal of visualized experiments : JoVE. 2018(137).
- 664 79. Kirienko NV, Cezairliyan BO, Ausubel FM, Powell JR. *Pseudomonas aeruginosa* PA14  
665 pathogenesis in *Caenorhabditis elegans*. Methods Mol Biol. 2014;1149:653-69.

666

667 **Figure 2-source data legend**

668 **Proteomic assays revealed the presence of ESRE-binding factor(s).**

669 **Source data 1** Raw, unedited electrophoretic mobility shift assay (EMSA) gel with three tandem ESRE  
670 sequences (3XESRE) as a bait.

671 **Source data 2** Raw, unedited EMSA gel with 3XESRE as a bait, with relevant bands labeled as in **Figure**  
672 **2B**.

673 **Source data 3** Raw, unedited EMSA gel with four tandem ESRE sequences (4XESRE) as a bait.

674 **Source data 4** Raw, unedited EMSA gel with 4XESRE as a bait, with relevant bands labeled as in **Figure**  
675 **2B**.
